# Supplementary material for: Synthesis of 7-hydroxy-6,7-dihydro-indole and 6′,7′-dihydro-3,7′-biindole derivatives from domino reactions of arylglyoxals or methyl ketones with enamines
Source: Royal Society of Chemistry journal article supplement (doi:10.1039/c5ra09478j), 2015-01-01

## Supporting Information for

# Synthesis of 7-Hydroxy-6,7-dihydro-indole and 6',7'-Dihydro-3,7'-biindole Derivatives from Domino Reactions of Arylglyoxals or Methyl Ketones with Enamines†

Xin-Mou Lu,<sup>a</sup> Zhong-Jian Cai,<sup>a</sup> Jian Li,<sup>a</sup> Shun-Yi Wang<sup>a,\*</sup> and Shun-Jun Ji

Key Laboratory of Organic Synthesis of Jiangsu Province, College of Chemistry, Chemical Engineering and Materials Science & Collaborative Innovation Center of Suzhou Nano Science and Technology, Soochow University, Suzhou, 215123, People's Republic of China. *E-mail:* shunyi@suda.edu.cn; shunjun@suda.edu.cn

### Table of contents

|                                                                                                                                                         |         |
|---------------------------------------------------------------------------------------------------------------------------------------------------------|---------|
| General information                                                                                                                                     | S2      |
| Synthetic procedures                                                                                                                                    | S2-S3   |
| <b>Table S1:</b> The Optimization of reaction conditions for the reactions of <b>6a</b> and <b>2a</b>                                                   | S4      |
| <b>Table S2.</b> Synthesis of 7-hydroxy-6,6-dimethyl-6,7-dihydro-1 <i>H</i> -indol-4(5 <i>H</i> )-one <b>3</b> from different acetophenone and enamines | S5      |
| Characterization Data of Compounds compounds <b>3</b> , <b>5</b> and <b>8</b>                                                                           | S5-S13  |
| Copies of <sup>1</sup> HNMR and <sup>13</sup> C NMR spectra of compounds <b>3</b> , <b>5</b> and <b>8</b>                                               | S14-S34 |
| X-ray structure of <b>3a</b>                                                                                                                            | S35     |
| <sup>1</sup> HNMR spectrum comparison of <b>3b</b> and the deuterated product <b>3b'</b>                                                                | S36     |

## I. General information

Unless otherwise stated, all reagents were purchased from commercial suppliers and used without further purification. All reactions were carried out in air and using undistilled solvent, without any precautions to exclude air and moisture unless otherwise noted. Melting points were recorded on an Electrothermal digital melting point apparatus and were uncorrected. IR spectra were recorded on a spectrophotometer using KBr optics. <sup>1</sup>HNMR and <sup>13</sup>CNMR spectra were recorded on a 400 MHz (<sup>1</sup>HNMR) and 100 MHz (<sup>13</sup>CNMR) spectrometer using CDCl<sub>3</sub>, DMSO-d<sub>6</sub> as solvent and TMS as internal standard. High resolution mass spectra were obtained using a high resolution ESI-TOF mass.

## II. Synthetic procedures

**General procedure for the preparation of the 7-hydroxy-6,6-dimethyl-2-phenyl-1-(p-tolyl)-6,7-dihydro-1*H*-indol-4(5*H*)-one derivatives **3** (3a as an example):**

A mixture of arylglyoxal **1a** (0.5 mmol) and enamine **2a** (0.75 mmol) was heated at 140 °C in DMF (2.5 mL) for 1 h and the reaction was monitored by TLC. After completion of the reaction, the resulting mixture was diluted with 10 mL of ethyl acetate and washed with 10 mL of brine. The aqueous layer was extracted with ethyl acetate (10 mL x 2). The organic layer was combined and dried over Na<sub>2</sub>SO<sub>4</sub> and concentrated. The resulting residue was purified by column chromatography on silica gel (petroleum ether/EtOAc=10:1) to yield the desired product **3a** as a yellow solid (143 mg, 83% yield)

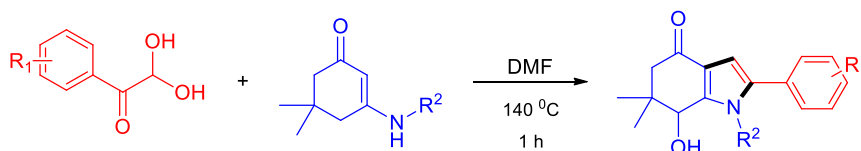

**General procedure for the preparation of the 7-hydroxy-6,6-dimethyl-2-phenyl-1-(p-tolyl)-6,7-dihydro-1*H*-indol-4(5*H*)-one derivatives from different substituted aryl methyl ketones and enamionone (3a as an example):**

A mixture of acetophenone **6a** (0.5 mmol) and I<sub>2</sub> (0.6 mmol) was heated at 95 °C in DMSO (2 mL) for 2 h. After cooling to the room temperature, H<sub>2</sub>O (100 uL), enamionone **2a** (0.6 mmol) were added and further heated at 95 °C for 2 h. Then the resulting mixture was diluted with 10 mL of ethyl acetate and washed with 10 mL of sodium thiosulfate saturated solution. The aqueous layer was extracted with ethyl acetate (10 mL x 2). The organic layer was combined and dried over Na<sub>2</sub>SO<sub>4</sub> and concentrated. The resulting residue was purified by column chromatography on silica gel (petroleum ether/EtOAc=10:1) to yield the desired product **3a** as a yellow solid (100 mg, 58% yield).

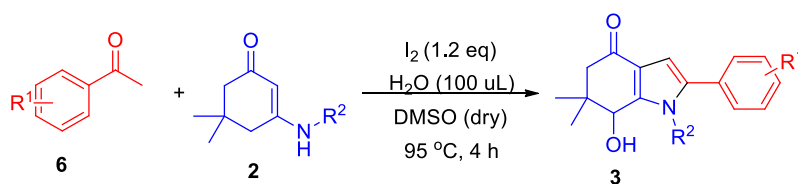

**General procedure for the preparation of the 1,2-diphenyl-1H-indol-4-ol derivatives 5 (5a as an example):**

A mixture of arylglyoxal **1a** (0.5 mmol) and enamine **4a** (0.75 mmol) was heated at 140 °C in DMF (2.5 mL) for 1 h and the reaction was monitored by TLC. After completion of the reaction, the resulting mixture was diluted with 10 mL of ethyl acetate and washed with 10 mL of brine. The aqueous layer was extracted with ethyl acetate (10 mL x 2). The organic layer was combined and dried over  $Na_2SO_4$  and concentrated. The resulting residue was purified by column chromatography on silica gel (petroleum ether/EtOAc=20:1) to yield the desired product **5a** as a purple solid (70 mg, 47% yield).

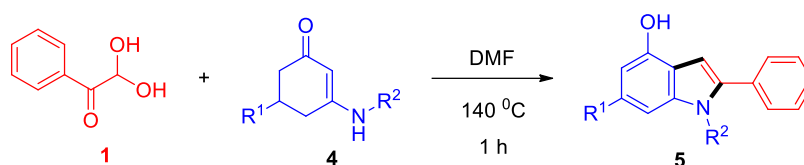

**General procedure for the preparation of the 1,6,6'-trimethyl-2'-phenyl-1'-(p-tolyl)-6',7'-dihydro-1H,1'H-[3,7'-biindol]-4'(5'H)-one derivatives 8 (8a as an example):**

A mixture of arylglyoxal **1a** (0.5 mmol) and enamine **2a** (0.75 mmol) was heated at 140 °C in DMF (2.5 mL) for 1 h. The reaction mixture was then cooled to room temperature, followed by addition of 1-methyl-1H-indole **7** (0.75 mmol) and PTSA (0.5 mmol). Then, the mixture was stirred for 8 h at 100 °C monitored by TLC. The resulting mixture was diluted with 10 mL of ethyl acetate and washed with 10 mL of brine. The aqueous layer was extracted with ethyl acetate (10 mL x 2). The organic layer was combined and dried over  $Na_2SO_4$  and concentrated. The crude product was purified by column chromatography on silica gel (petroleum ether/EtOAc=8:1) to yield the desired product **8a** as a yellow solid (144 mg, 63% yield).

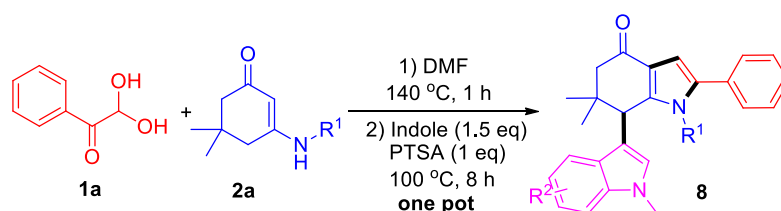

**Table S1:** The Optimization of reaction conditions for the reactions of **6a** and **2a**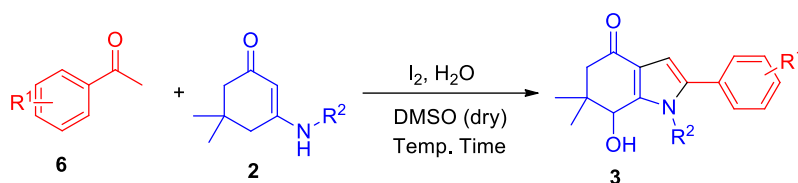

| Entry | Cat.(eq)             | Time1 (h) <sup>b</sup> | Time 2 (h) <sup>c</sup> | T (°C) | Solvent (dry) | H <sub>2</sub> O (uL) | Yield (%) <sup>d</sup> |
|-------|----------------------|------------------------|-------------------------|--------|---------------|-----------------------|------------------------|
| 1     | I <sub>2</sub> (1.2) | 2                      | 2                       | 95     | DMSO          | -                     | N.R.                   |
| 2     | I <sub>2</sub> (1.2) | 2                      | 2                       | 95     | DMSO          | 20                    | 50                     |
| 3     | I <sub>2</sub> (1.2) | 2                      | 2                       | 95     | DMSO          | 50                    | 61                     |
| 4     | I <sub>2</sub> (1.2) | 2                      | 2                       | 95     | DMSO          | 100                   | 66(58 <sup>e</sup> )   |
| 5     | I <sub>2</sub> (1.2) | 2                      | 2                       | 95     | DMSO          | 200                   | 64                     |
| 6     | I <sub>2</sub> (1.5) | 2                      | 2                       | 95     | DMSO          | 100                   | 65                     |
| 7     | I <sub>2</sub> (1.0) | 2                      | 2                       | 95     | DMSO          | 100                   | 62                     |
| 8     | I <sub>2</sub> (0.8) | 2                      | 2                       | 95     | DMSO          | 100                   | 58                     |
| 9     | I <sub>2</sub> (1.2) | 2                      | 2                       | 40     | DMSO          | 100                   | 43                     |
| 10    | I <sub>2</sub> (1.2) | 2                      | 2                       | 60     | DMSO          | 100                   | 58                     |
| 11    | I <sub>2</sub> (1.2) | 2                      | 2                       | 80     | DMSO          | 100                   | 59                     |
| 12    | I <sub>2</sub> (1.2) | 2                      | 2                       | 100    | DMSO          | 100                   | 38                     |
| 13    | I <sub>2</sub> (1.2) | 2                      | 2                       | 120    | DMSO          | 100                   | 16                     |
| 14    | I <sub>2</sub> (1.2) | 2                      | 0.5                     | 95     | DMSO          | 100                   | 57                     |
| 15    | I <sub>2</sub> (1.2) | 2                      | 1                       | 95     | DMSO          | 100                   | 63                     |
| 16    | I <sub>2</sub> (1.2) | 2                      | 3                       | 95     | DMSO          | 100                   | 58                     |
| 17    | I <sub>2</sub> (1.2) | 2                      | 4                       | 95     | DMSO          | 100                   | 57                     |
| 18    | I <sub>2</sub> (1.2) | 2                      | 6                       | 95     | DMSO          | 100                   | 44                     |
| 19    | I <sub>2</sub> (1.2) | 2                      | 12                      | 95     | DMSO          | 100                   | 31                     |

<sup>a</sup>Reaction conditions: **6a** (0.5 mmol), **2a** (0.6 mmol), solvent (2 mL). <sup>b</sup>The first step of the reaction time (2h). <sup>c</sup>The second step of the reaction time. <sup>d</sup>Yields were determined by LC analysis with biphenyl (0.5 mmol) as the internal standard. <sup>e</sup>Isolated yield.

**Table S2.** Synthesis of 7-hydroxy-6,6-dimethyl-6,7-dihydro-1*H*-indol-4(5*H*)-one **3** from different acetophenone and enamines<sup>a,b</sup>

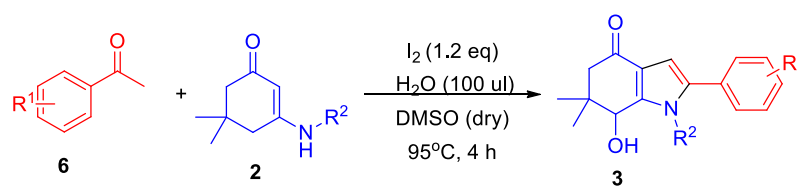

| entry | R <sup>1</sup>                                     | R <sup>2</sup>                                     | <b>3</b>  | yield (%) |
|-------|----------------------------------------------------|----------------------------------------------------|-----------|-----------|
| 1     | H ( <b>6a</b> )                                    | 4-MeC <sub>6</sub> H <sub>4</sub> - ( <b>2a</b> )  | <b>3a</b> | 58        |
| 2     | H ( <b>6a</b> )                                    | 4-BrC <sub>6</sub> H <sub>4</sub> - ( <b>2b</b> )  | <b>3b</b> | 41        |
| 3     | H ( <b>6a</b> )                                    | 4-OMeC <sub>6</sub> H <sub>4</sub> - ( <b>2d</b> ) | <b>3d</b> | 36        |
| 4     | H ( <b>6a</b> )                                    | 2-naphthalen- ( <b>2g</b> )                        | <b>3g</b> | 47        |
| 5     | 4-BrC <sub>6</sub> H <sub>4</sub> - ( <b>6b</b> )  | 4-MeC <sub>6</sub> H <sub>4</sub> - ( <b>2a</b> )  | <b>3h</b> | 34        |
| 6     | 4-ClC <sub>6</sub> H <sub>4</sub> - ( <b>6c</b> )  | 4-MeC <sub>6</sub> H <sub>4</sub> - ( <b>2a</b> )  | <b>3i</b> | 50        |
| 7     | 3-ClC <sub>6</sub> H <sub>4</sub> - ( <b>6d</b> )  | 4-MeC <sub>6</sub> H <sub>4</sub> - ( <b>2a</b> )  | <b>3j</b> | 48        |
| 8     | 4-OMeC <sub>6</sub> H <sub>4</sub> - ( <b>6e</b> ) | 4-MeC <sub>6</sub> H <sub>4</sub> - ( <b>2a</b> )  | <b>3k</b> | 46        |
| 9     | 4-MeC <sub>6</sub> H <sub>4</sub> - ( <b>6f</b> )  | 4-MeC <sub>6</sub> H <sub>4</sub> - ( <b>2a</b> )  | <b>3l</b> | 45        |
| 10    | 2-MeC <sub>6</sub> H <sub>4</sub> - ( <b>6g</b> )  | 4-MeC <sub>6</sub> H <sub>4</sub> - ( <b>2a</b> )  | <b>3m</b> | 38        |

<sup>a</sup>Reaction conditions: **6a** (0.5 mmol), **2a** (0.6 mmol), I<sub>2</sub> (0.6 mmol), and H<sub>2</sub>O (100 μL) in DMSO (2 mL) at 95 °C for 4 hours. <sup>b</sup>Isolated yield.

### III.Characterization Data of Compounds **3**, **5** and **8** :

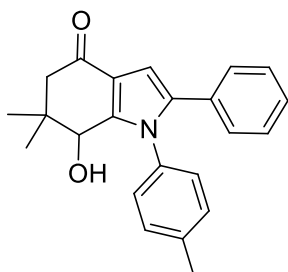

#### **7-hydroxy-6,6-dimethyl-2-phenyl-1-(p-tolyl)-6,7-dihydro-1*H*-indol-4(5*H*)-one(3a):**

yellow solid. m. p.: 178-180 °C. **IR** (neat, v, cm<sup>-1</sup>): 3065, 2961, 2878, 1714, 1606, 745, 726, 693 cm<sup>-1</sup>. <sup>1</sup>HNMR (400 MHz, DMSO) δ 7.30 – 7.15 (m, 6H), 7.11 (d, *J* = 6.9 Hz, 3H), 6.63 (s, 1H), 5.39 (d, *J* = 7.3 Hz, 1H), 3.84 (d, *J* = 7.1 Hz, 1H), 2.78 (d, *J* = 16.4 Hz, 1H), 2.35 (s, 3H), 1.98 (d, *J* = 16.4 Hz, 1H), 1.03 (s, 3H), 0.87 (s, 3H). <sup>13</sup>CNMR (101 MHz, DMSO) δ 193.4, 146.0, 138.4, 136.8, 134.9, 132.1, 130.2, 128.7, 128.5, 128.2, 127.5, 119.5, 105.2, 68.0, 47.2, 26.4, 25.9, 21.1. **HRMS (ESI-TOF)** Calcd for C<sub>23</sub>H<sub>24</sub>NO<sub>2</sub><sup>+</sup> ([M+H]<sup>+</sup>) 346.1807. Found 346.1811.

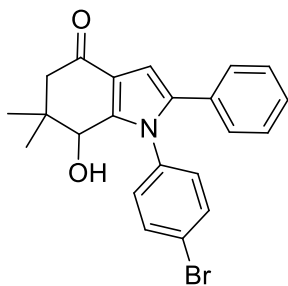

**1-(4-bromophenyl)-7-hydroxy-6,6-dimethyl-2-phenyl-6,7-dihydro-1H-in**

**dol-4(5H)-one(3b):** yellow solid. m. p.: 153-155 °C. **IR** (neat, v, cm<sup>-1</sup>): 3372, 2958, 1649, 1600, 1522, 763, 696, 673 cm<sup>-1</sup>. <sup>1</sup>HNMR (400 MHz, DMSO) δ 7.66 (d, *J* = 5.1 Hz, 2H), 7.33 – 7.17 (m, 4H), 7.12 (d, *J* = 6.8 Hz, 3H), 6.64 (s, 1H), 5.45 (d, *J* = 7.3 Hz, 1H), 3.89 (d, *J* = 7.1 Hz, 1H), 2.76 (d, *J* = 16.3 Hz, 1H), 2.00 (d, *J* = 16.0 Hz, 1H), 1.03 (s, 3H), 0.89 (s, 3H). <sup>13</sup>CNMR (101 MHz, DMSO) δ 193.4, 145.8, 136.8, 132.7, 131.7, 130.6, 128.9, 128.6, 127.7, 122.0, 119.8, 105.5, 68.0, 47.3, 26.2, 25.9. **HRMS (ESI-TOF)** Calcd for C<sub>22</sub>H<sub>21</sub>BrNO<sub>2</sub><sup>+</sup> ([M+H]<sup>+</sup>) 410.0756. Found 410.0760.

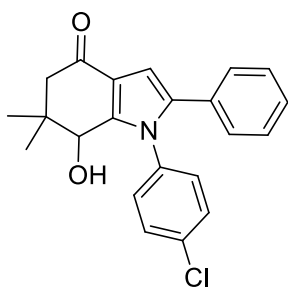

**1-(4-chlorophenyl)-7-hydroxy-6,6-dimethyl-2-phenyl-6,7-dihydro-1H-in**

**dol-4(5H)-one(3c):** yellow solid. m. p.: 139-141 °C. **IR** (neat, v, cm<sup>-1</sup>): 2955, 2852, 1726, 1633, 1556, 762, 695, 638 cm<sup>-1</sup>. <sup>1</sup>HNMR (400 MHz, DMSO) δ 7.66 (d, *J* = 5.1 Hz, 2H), 7.35 – 7.01 (m, 7H), 6.64 (s, 1H), 5.45 (d, *J* = 7.3 Hz, 1H), 3.89 (d, *J* = 7.1 Hz, 1H), 2.76 (d, *J* = 16.3 Hz, 1H), 2.00 (d, *J* = 16.0 Hz, 1H), 1.03 (s, 3H), 0.89 (s, 3H). <sup>13</sup>CNMR (101 MHz, CDCl<sub>3</sub>) δ 194.1, 144.0, 137.6, 135.8, 134.4, 131.3, 129.5, 129.2, 128.5, 128.4, 127.5, 120.1, 105.9, 69.3, 46.8, 39.5, 29.7, 25.8, 16.3. **HRMS (ESI-TOF)** Calcd for C<sub>22</sub>H<sub>21</sub>ClNO<sub>2</sub><sup>+</sup> ([M+H]<sup>+</sup>) 366.1261. Found 366.1262.

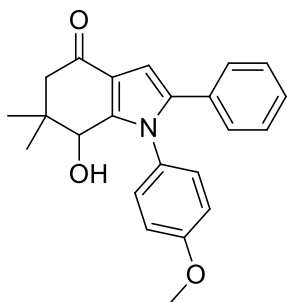

**7-hydroxy-1-(4-methoxyphenyl)-6,6-dimethyl-2-phenyl-6,7-dihydro-1H-**

**indol-4(5H)-one(3d):** yellow solid. m. p.: 149-151 °C. **IR** (neat, v, cm<sup>-1</sup>): 3068, 2963, 2873, 1719, 1606, 741, 724, 691 cm<sup>-1</sup>. <sup>1</sup>HNMR (400 MHz, DMSO) δ 7.29 – 7.15 (m, 4H), 7.12 (d, *J* = 6.7 Hz, 2H), 7.00 (s, 3H), 6.62 (s, 1H), 5.37 (d, *J* = 7.4 Hz, 1H), 3.83 (d, *J* = 7.3 Hz, 1H), 3.79 (s, 3H), 2.76

(d,  $J = 16.4$  Hz, 1H), 1.98 (d,  $J = 16.3$  Hz, 1H), 1.03 (s, 3H), 0.88 (s, 3H).  $^{13}\text{C}$ NMR (101 MHz, DMSO)  $\delta$  193.4, 159.3, 146.1, 136.9, 132.1, 130.1, 129.7, 128.7, 128.4, 127.5, 119.3, 114.8, 104.9, 68.0, 55.8, 47.2, 26.4, 25.9. **HRMS (ESI-TOF)** Calcd for  $\text{C}_{23}\text{H}_{24}\text{NO}_3^+$  ( $[\text{M}+\text{H}]^+$ ) 362.1756. Found 362.1758.

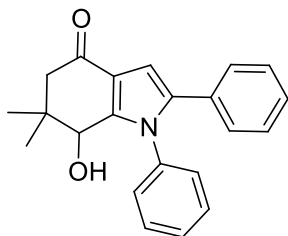

**7-hydroxy-6,6-dimethyl-1,2-diphenyl-6,7-dihydro-1H-indol-4(5H)-one(3e):**

yellow solid. m. p.: 162-163 °C. **IR** (neat, v,  $\text{cm}^{-1}$ ): 3298, 2972, 2956, 2887, 1716, 1698, 1684, 1576, 737, 665  $\text{cm}^{-1}$ .  $^1\text{H}$ NMR (400 MHz, DMSO)  $\delta$  7.45 (s, 4H), 7.20 (d,  $J = 6.5$  Hz, 4H), 7.09 (d,  $J = 6.6$  Hz, 2H), 6.64 (s, 1H), 5.43 (d,  $J = 7.3$  Hz, 1H), 3.85 (d,  $J = 7.1$  Hz, 1H), 2.77 (d,  $J = 16.4$  Hz, 1H), 1.99 (d,  $J = 16.3$  Hz, 1H), 1.03 (s, 3H), 0.88 (s, 3H).  $^{13}\text{C}$ NMR (101 MHz, DMSO)  $\delta$  193.4, 145.9, 137.4, 136.8, 132.0, 129.7, 128.9, 128.7, 128.5, 128.5, 127.6, 119.5, 105.3, 68.1, 47.2, 26.4, 25.9. **HRMS (ESI-TOF)** Calcd for  $\text{C}_{22}\text{H}_{22}\text{NO}_2^+$  ( $[\text{M}+\text{H}]^+$ ) 332.1651. Found 332.1658.

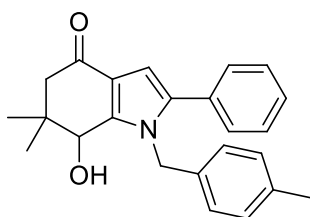

**7-hydroxy-6,6-dimethyl-1-(4-methylbenzyl)-2-phenyl-6,7-dihydro-1H-indol-4(5H)-one(3f):**

yellow solid. m. p.: 163-164 °C. **IR** (neat, v,  $\text{cm}^{-1}$ ): 2957, 2921, 2869, 1644, 1607, 1561, 760, 718, 677  $\text{cm}^{-1}$ .  $^1\text{H}$ NMR (400 MHz, DMSO)  $\delta$  7.34 (dt,  $J = 10.7, 6.9$  Hz, 5H), 7.10 (d,  $J = 7.8$  Hz, 2H), 6.78 (d,  $J = 7.9$  Hz, 2H), 6.46 (s, 1H), 5.56 (d,  $J = 7.2$  Hz, 1H), 5.35 (d,  $J = 17.1$  Hz, 1H), 5.24 (d,  $J = 17.1$  Hz, 1H), 4.07 (d,  $J = 7.0$  Hz, 1H), 2.70 (d,  $J = 16.2$  Hz, 1H), 2.24 (s, 3H), 2.04 – 1.94 (m, 1H), 1.03 (s, 3H), 0.84 (s, 3H).  $^{13}\text{C}$ NMR (101 MHz, DMSO)  $\delta$  193.0, 144.8, 137.0, 136.7, 135.5, 132.2, 129.6, 129.1, 129.1, 128.3, 125.8, 119.3, 105.0, 68.3, 47.6, 47.4, 26.3, 26.0, 21.1. **HRMS (ESI-TOF)** Calcd for  $\text{C}_{24}\text{H}_{26}\text{NO}_2^+$  ( $[\text{M}+\text{H}]^+$ ) 360.1964. Found 360.1967.

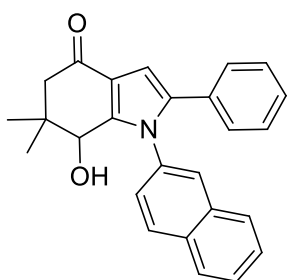

**7-hydroxy-6,6-dimethyl-1-(naphthalen-2-yl)-2-phenyl-6,7-dihydro-1H-indol-4(5H)-one(3g):**

yellow solid. m. p.: 101-102 °C. **IR** (neat, v,  $\text{cm}^{-1}$ ): 2955, 2922, 2863, 1644, 1599, 1556, 752, 696, 660  $\text{cm}^{-1}$ .  $^1\text{H}$ NMR (400 MHz, DMSO)  $\delta$  7.99 (s, 4H), 7.60 (s, 3H), 7.16 (s,

5H), 6.71 (s, 1H), 5.47 (s, 1H), 3.97 (d,  $J = 35.0$  Hz, 1H), 2.80 (d,  $J = 16.3$  Hz, 1H), 2.02 (d,  $J = 16.9$  Hz, 1H), 0.97 (d,  $J = 42.4$  Hz, 6H).  $^{13}\text{C}$ NMR (101 MHz, DMSO)  $\delta$  193.5, 146.2, 135.0, 133.1, 132.7, 132.0, 129.4, 128.8, 128.4, 128.2, 127.6, 127.5, 127.4, 126.9, 126.6, 119.7, 105.4, 68.1, 47.3, 45.7, 26.3, 25.9. **HRMS (ESI-TOF)** Calcd for  $\text{C}_{26}\text{H}_{24}\text{NO}_2^+$  ( $[\text{M}+\text{H}]^+$ ) 382.1807. Found 382.1834.

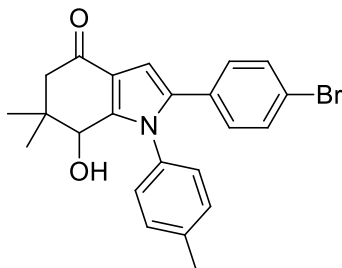

**2-(4-bromophenyl)-7-hydroxy-6,6-dimethyl-1-(p-tolyl)-6,7-dihydro-1H-indol-4(5H)-one(3h):** yellow solid. m. p.: 179-181 °C. **IR** (neat, v,  $\text{cm}^{-1}$ ): 3354, 2963, 2934, 1672, 1644, 1545, 743, 708, 661  $\text{cm}^{-1}$ .  $^1\text{H}$ NMR (400 MHz, DMSO)  $\delta$  7.49 – 7.18 (m, 5H), 7.05 (d,  $J = 8.1$  Hz, 3H), 6.69 (s, 1H), 5.42 (d,  $J = 6.6$  Hz, 1H), 3.85 (s, 1H), 2.78 (d,  $J = 16.4$  Hz, 1H), 2.36 (s, 3H), 1.99 (d,  $J = 16.4$  Hz, 1H), 1.03 (s, 3H), 0.87 (s, 3H).  $^{13}\text{C}$ NMR (101 MHz, DMSO)  $\delta$  193.4, 146.3, 138.5, 135.5, 134.6, 131.7, 131.3, 130.4, 130.3, 128.2, 120.9, 119.6, 105.7, 68.0, 47.2, 26.4, 25.8, 21.2. **HRMS (ESI-TOF)** Calcd for  $\text{C}_{23}\text{H}_{23}\text{BrNO}_2^+$  ( $[\text{M}+\text{H}]^+$ ) 424.0912. Found 424.0902

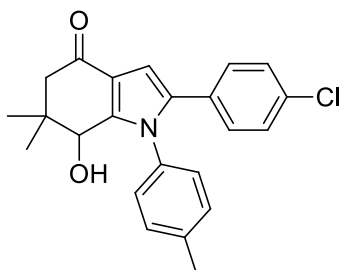

**2-(4-chlorophenyl)-7-hydroxy-6,6-dimethyl-1-(p-tolyl)-6,7-dihydro-1H-indol-4(5H)-one(3i):** yellow solid. m. p.: 187-189 °C. **IR** (neat, v,  $\text{cm}^{-1}$ ): 3264, 2963, 1673, 1645, 1555, 749, 720, 657  $\text{cm}^{-1}$ .  $^1\text{H}$ NMR (400 MHz, DMSO)  $\delta$  7.28 (d,  $J = 8.5$  Hz, 5H), 7.11 (d,  $J = 8.5$  Hz, 3H), 6.68 (s, 1H), 5.41 (d,  $J = 7.3$  Hz, 1H), 3.84 (d,  $J = 7.2$  Hz, 1H), 2.77 (d,  $J = 16.4$  Hz, 1H), 2.36 (s, 3H), 1.99 (d,  $J = 16.4$  Hz, 1H), 1.03 (s, 3H), 0.87 (s, 3H).  $^{13}\text{C}$ NMR (101 MHz, DMSO)  $\delta$  193.4, 146.2, 138.5, 135.5, 134.6, 132.3, 131.0, 130.3, 130.1, 128.8, 128.2, 119.5, 105.7, 68.0, 47.2, 26.4, 25.8, 21.2. **HRMS (ESI-TOF)** Calcd for  $\text{C}_{23}\text{H}_{23}\text{ClNO}_2^+$  ( $[\text{M}+\text{H}]^+$ ) 380.1417. Found 380.1419.



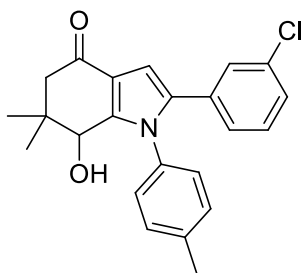

**2-(3-chlorophenyl)-7-hydroxy-6,6-dimethyl-1-(p-tolyl)-6,7-dihydro-1H-indol-4(5H)-one(3j):** yellow solid. m. p.: 165-167 °C. **IR** (neat, v, cm<sup>-1</sup>): 2957, 2931, 1639, 1597, 1567, 726, 690, 663 cm<sup>-1</sup>. <sup>1</sup>HNMR (400 MHz, DMSO) δ 7.23 (dd, *J* = 26.7, 21.4 Hz, 7H), 7.03 (d, *J* = 4.3 Hz, 1H), 6.75 (s, 1H), 5.43 (d, *J* = 7.3 Hz, 1H), 3.86 (d, *J* = 7.2 Hz, 1H), 2.78 (d, *J* = 16.4 Hz, 1H), 2.36 (s, 3H), 2.00 (d, *J* = 16.4 Hz, 1H), 1.03 (s, 3H), 0.88 (s, 3H). <sup>13</sup>CNMR (101 MHz, DMSO) δ 193.4, 146.4, 138.6, 135.1, 134.6, 134.1, 133.4, 130.5, 130.3, 128.2, 128.0, 127.3, 126.9, 119.5, 106.1, 89.4, 68.0, 47.2, 26.4, 25.8, 21.2, 15.9. **HRMS (ESI-TOF)** Calcd for C<sub>23</sub>H<sub>23</sub>ClNO<sub>2</sub><sup>+</sup> ([M+H]<sup>+</sup>) 380.1417. Found 380.1419.

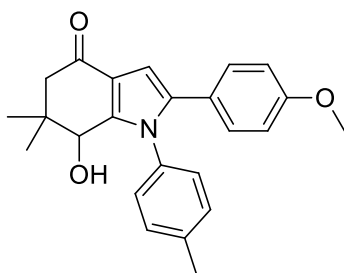

**7-hydroxy-2-(4-methoxyphenyl)-6,6-dimethyl-1-(p-tolyl)-6,7-dihydro-1H-indol-4(5H)-one(3k):** yellow solid. m. p.: 198-200 °C. **IR** (neat, v, cm<sup>-1</sup>): 3414, 2969, 1634, 1613, 1560, 732, 691, 675 cm<sup>-1</sup>. <sup>1</sup>HNMR (400 MHz, DMSO) δ 7.25 (s, 3H), 7.04 (d, *J* = 8.5 Hz, 3H), 6.79 (d, *J* = 8.5 Hz, 2H), 6.53 (s, 1H), 5.36 (d, *J* = 7.3 Hz, 1H), 3.83 (d, *J* = 7.2 Hz, 1H), 3.69 (s, 3H), 2.77 (d, *J* = 16.4 Hz, 1H), 2.35 (s, 3H), 1.97 (d, *J* = 16.0 Hz, 1H), 1.02 (s, 3H), 0.87 (s, 3H). <sup>13</sup>CNMR (101 MHz, DMSO) δ 193.4, 158.8, 145.5, 138.3, 136.7, 135.0, 130.2, 129.9, 128.3, 124.5, 119.3, 114.2, 104.3, 68.1, 55.5, 47.2, 26.4, 25.9, 21.2. **HRMS (ESI-TOF)** Calcd for C<sub>24</sub>H<sub>26</sub>NO<sub>3</sub><sup>+</sup> ([M+H]<sup>+</sup>) 376.1913. Found 376.1914.

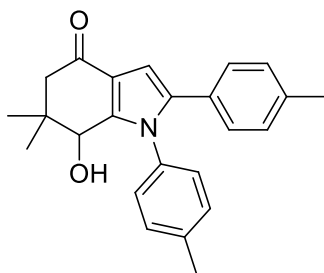

**7-hydroxy-6,6-dimethyl-1,2-di-p-tolyl-6,7-dihydro-1H-indol-4(5H)-one(3l):** yellow solid. m. p.: 180-182 °C. **IR** (neat, v, cm<sup>-1</sup>): 3372, 2958, 1649, 1600, 1555, 763, 637 cm<sup>-1</sup>. <sup>1</sup>HNMR (400 MHz, DMSO) δ 7.25 (s, 3H), 7.01 (d, *J* = 2.6 Hz, 5H), 6.58 (s, 1H), 5.38 (s, 1H), 3.84 (s, 1H), 2.77 (d, *J* = 16.4 Hz, 1H), 2.35 (s, 3H), 2.22 (s, 3H), 1.98 (d, *J* = 16.4 Hz, 1H), 1.03 (s, 3H), 0.87 (s, 3H). <sup>13</sup>CNMR (101 MHz, DMSO) δ 193.4, 145.8, 138.3, 136.9, 134.9, 130.2,

129.3, 129.3, 128.4, 128.2, 119.4, 104.71, 68.1, 47.2, 26.4, 25.9, 21.1, 21.1. **HRMS (ESI-TOF)** Calcd for  $C_{24}H_{26}NO_2^+$  ( $[M+H]^+$ ) 360.1964. Found 360.1960.

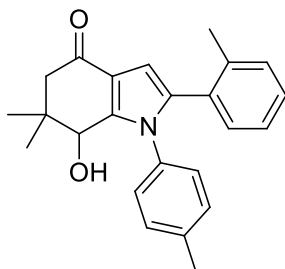

**7-hydroxy-6,6-dimethyl-2-(o-tolyl)-1-(p-tolyl)-6,7-dihydro-1H-indol-4(5H)-one(3m):** yellow solid. m. p.: 95-96 °C. **IR** (neat, v,  $cm^{-1}$ ): 3332, 2956, 1642, 1557, 761, 681, 638  $cm^{-1}$ .  $^1H$ NMR (400 MHz, DMSO)  $\delta$  7.18 – 7.02 (m, 8H), 6.42 (s, 1H), 5.41 (d,  $J = 7.5$  Hz, 1H), 3.88 (d,  $J = 7.5$  Hz, 1H), 2.79 (d,  $J = 16.5$  Hz, 1H), 2.27 (s, 3H), 2.07 (s, 3H), 1.99 (d,  $J = 16.4$  Hz, 1H), 1.04 (s, 3H), 0.89 (s, 3H).  $^{13}C$ NMR (101 MHz, DMSO)  $\delta$  193.5, 144.6, 137.9, 137.6, 135.8, 134.6, 132.0, 131.7, 130.3, 129.8, 128.7, 128.6, 127.7, 125.8, 119.1, 105.7, 68.2, 47.3, 39.7, 26.4, 25.9, 21.0, 20.5. **HRMS (ESI-TOF)** Calcd for  $C_{24}H_{26}NO_2^+$  ( $[M+H]^+$ ) 360.1964. Found 360.1960.

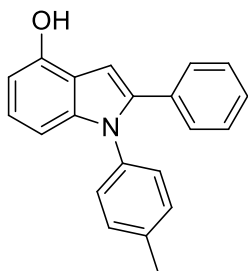

**2-phenyl-1-(p-tolyl)-1H-indol-4-ol (5a):** purple solid. m. p.: 125-127 °C. **IR** (neat, v,  $cm^{-1}$ ): 2970, 2925, 2869, 1660, 1603, 1555, 753, 711, 655  $cm^{-1}$ .  $^1H$ NMR (400 MHz, DMSO)  $\delta$  9.64 (s, 1H), 7.34 – 7.19 (m, 7H), 7.13 (d,  $J = 8.2$  Hz, 2H), 6.91 (dd,  $J = 20.5, 12.6$  Hz, 2H), 6.59 (d,  $J = 8.2$  Hz, 1H), 6.49 (d,  $J = 7.6$  Hz, 1H), 2.35 (s, 3H).  $^{13}C$ NMR (101 MHz, DMSO)  $\delta$  151.1, 141.2, 138.7, 137.3, 136.2, 130.4, 128.8, 128.8, 128.1, 127.6, 123.9, 118.3, 105.2, 102.2, 101.3, 100.4, 21.1. **HRMS (ESI-TOF)** Calcd for  $C_{21}H_{18}NO^+$  ( $[M+H]^+$ ) 300.1388. Found 300.1393.

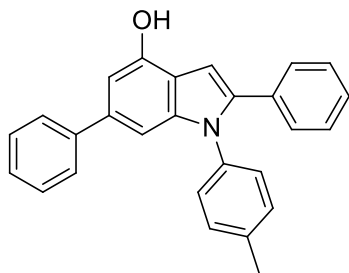

**2,6-diphenyl-1-(p-tolyl)-1H-indol-4-ol(5b):** green solid. m. p.: 136-138 °C. **IR** (neat, v,  $cm^{-1}$ ): 3450, 3120, 1586, 1571, 761, 658  $cm^{-1}$ .  $^1H$ NMR (400 MHz,  $CDCl_3$ )  $\delta$  7.58 – 7.52 (m, 2H), 7.38 (dd,  $J = 10.4, 4.8$  Hz, 2H), 7.30 – 7.21 (m, 8H), 7.18 – 7.13 (m, 2H), 7.06 (s, 1H), 6.85 – 6.83 (m, 2H), 2.40 (s, 3H).  $^{13}C$ NMR (101 MHz,  $CDCl_3$ )  $\delta$  148.8, 142.1, 141.4, 140.4, 137.3, 137.1, 135.8, 132.5, 130.0, 128.8, 128.6, 128.2, 127.8, 127.4, 127.3, 126.75, 117.1,

104.9, 102.7, 99.4, 21.2. **HRMS (ESI-TOF)** Calcd for  $C_{27}H_{22}NO^+$  ( $[M+H]^+$ ) 376.1701. Found 376.1701.

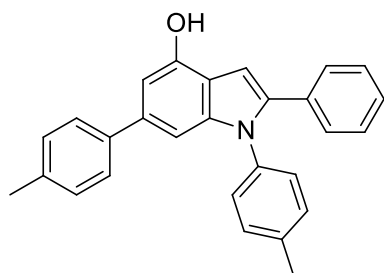

**2-phenyl-1,6-di-p-tolyl-1H-indol-4-ol(5c):** green solid. m. p.: 200-201 °C. **IR** (neat, v,  $cm^{-1}$ ): 3540, 3103, 2875, 1585, 1515, 761, 725, 650  $cm^{-1}$ .  $^1H$ NMR (400 MHz, DMSO)  $\delta$  9.82 (s, 1H), 7.41 (d,  $J = 7.9$  Hz, 2H), 7.33 – 7.13 (m, 11H), 6.91 (s, 1H), 6.80 (d,  $J = 2.0$  Hz, 2H), 2.35 (s, 3H), 2.30 (s, 3H).  $^{13}C$ NMR (101 MHz, DMSO)  $\delta$  151.3, 141.7, 139.3, 139.1, 137.4, 136.6, 136.3, 136.1, 132.6, 130.5, 129.8, 128.8, 128.7, 128.1, 127.7, 126.9, 117.7, 104.5, 101.3, 100.3, 21.2, 21.1. **HRMS (ESI-TOF)** Calcd for  $C_{28}H_{24}NO^+$  ( $[M+H]^+$ ) 390.1858. Found 390.1848.

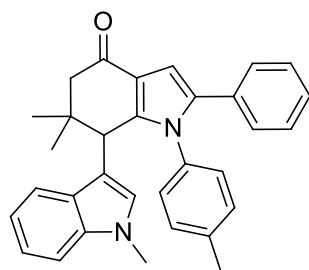

**1,6,6'-trimethyl-2'-phenyl-1'-(p-tolyl)-6',7'-dihydro-1H,1'H-[3,7'-biindol]-4'(5'H)-one (8a):** yellow solid. m. p.: 198-199 °C. **IR** (neat, v,  $cm^{-1}$ ): 2951, 2926, 1656, 1604, 761, 641  $cm^{-1}$ .  $^1H$ NMR (400 MHz,  $CDCl_3$ )  $\delta$  7.12 (dd,  $J = 20.7, 13.4$  Hz, 4H), 7.07 – 6.89 (m, 8H), 6.79 (s, 2H), 6.55 (s, 1H), 3.72 (s, 1H), 3.63 (s, 3H), 2.83 – 2.64 (m, 1H), 2.13 (s, 3H), 2.06 (d,  $J = 17.1$  Hz, 1H), 1.17 (s, 3H), 0.73 (s, 3H).  $^{13}C$ NMR (101 MHz, DMSO)  $\delta$  192.5, 169.5, 140.6, 138.9, 138.0, 134.3, 133.3, 131.6, 130.6, 130.2, 129.7, 129.0, 128.7, 128.6, 128.4, 128.1, 127.9, 121.1, 105.1, 69.0, 60.2, 48.2, 39.1, 26.0, 25.364, 21.172, 20.8. **HRMS (ESI-TOF)** Calcd for  $C_{32}H_{31}N_2O^+$  ( $[M+H]^+$ ) 459.2436. Found 459.2438.

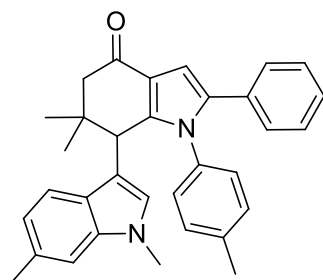

**1,6,6',6'-tetramethyl-2'-phenyl-1'-(p-tolyl)-6',7'-dihydro-1H,1'H-[3,7'-biindol]-4'(5'H)-one(8b):** yellow solid. m. p.: 227-228 °C. **IR** (neat, v,  $cm^{-1}$ ): 2956, 2921, 1661, 1602, 1550, 760, 642  $cm^{-1}$ .  $^1H$ NMR (400 MHz,  $CDCl_3$ )  $\delta$  6.99 (dt,  $J = 5.9, 5.4$  Hz, 9H), 6.83 –

6.71 (m, 3H), 6.47 (s, 2H), 3.68 (s, 1H), 3.58 (s, 3H), 2.77 (d,  $J = 17.1$  Hz, 1H), 2.40 (s, 3H), 2.14 (s, 3H), 2.04 (d,  $J = 15.8$  Hz, 1H), 1.15 (s, 3H), 0.72 (s, 3H).  $^{13}\text{C}$ NMR (101 MHz,  $\text{CDCl}_3$ )  $\delta$  194.7, 137.8, 137.3, 136.4, 134.9, 132.0, 131.3, 129.4, 128.1, 127.9, 127.8, 127.5, 127.2, 126.7, 125.8, 120.8, 118.9, 113.0, 109.1, 105.2, 60.4, 39.3, 32.8, 28.5, 28.4, 21.9, 21.1, 14.2. **HRMS (ESI-TOF)** Calcd for  $\text{C}_{33}\text{H}_{33}\text{N}_2\text{O}^+$  ( $[\text{M}+\text{H}]^+$ ) 473.2593. Found 473.2588.

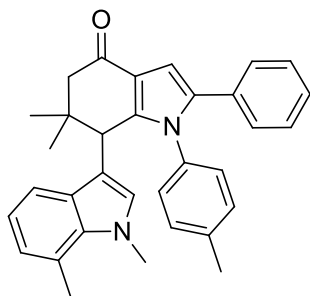

**1,6,6',7'-tetramethyl-2'-phenyl-1'-(p-tolyl)-6',7'-dihydro-1H,1'H-[3,7'-**

**biindol]-4'(5'H)-one(8c):** purple solid. m. p.: 183-185 °C. **IR** (neat, v,  $\text{cm}^{-1}$ ): 2951, 2925, 1660, 1602, 759, 642  $\text{cm}^{-1}$ .  $^1\text{H}$ NMR (400 MHz,  $\text{CDCl}_3$ )  $\delta$  7.01 (dt,  $J = 7.2, 4.4$  Hz, 8H), 6.78 (t,  $J = 6.5$  Hz, 5H), 6.45 (s, 1H), 3.91 (s, 3H), 3.68 (s, 1H), 2.78 (d,  $J = 17.1$  Hz, 1H), 2.69 (s, 3H), 2.16 (s, 3H), 2.05 (d,  $J = 17.1$  Hz, 1H), 1.15 (s, 3H), 0.72 (s, 3H).  $^{13}\text{C}$ NMR (101 MHz, DMSO)  $\delta$  193.0, 137.8, 136.0, 135.4, 134.9, 132.1, 129.8, 129.0, 128.6, 128.1, 127.2, 124.0, 121.3, 119.1, 117.1, 111.8, 105.3, 48.2, 36.6, 31.4, 28.3, 28.1, 22.5, 21.0, 19.7, 14.4. **HRMS (ESI-TOF)** Calcd for  $\text{C}_{33}\text{H}_{33}\text{N}_2\text{O}^+$  ( $[\text{M}+\text{H}]^+$ ) 473.2593. Found 473.2591.

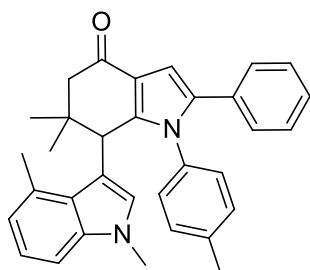

**1,4,6,6'-tetramethyl-2'-phenyl-1'-(p-tolyl)-6',7'-dihydro-1H,1'H-[3,7'-**

**biindol]-4'(5'H)-one(8d):** purple solid. m. p.: 184-186 °C. **IR** (neat, v,  $\text{cm}^{-1}$ ): 2851, 1657, 1600, 1552, 738, 671  $\text{cm}^{-1}$ .  $^1\text{H}$ NMR (400 MHz,  $\text{CDCl}_3$ )  $\delta$  7.09 – 6.92 (m, 9H), 6.77 (s, 2H), 6.68 – 6.60 (m, 2H), 6.46 (s, 1H), 4.11 (s, 1H), 3.63 (s, 3H), 2.83 (d,  $J = 17.3$  Hz, 1H), 2.33 (s, 1H), 2.17 (s, 3H), 2.00 (s, 3H), 1.18 (s, 3H), 0.70 (s, 3H).  $^{13}\text{C}$ NMR (101 MHz,  $\text{CDCl}_3$ )  $\delta$  194.5, 150.2, 138.3, 137.1, 136.4, 135.1, 132.0, 130.4, 128.4, 128.1, 128.0, 127.9, 127.8, 126.7, 126.1, 121.4, 121.4, 118.8, 113.8, 107.3, 104.8, 48.0, 41.2, 39.1, 33.0, 28.6, 27.7, 21.0, 20.7. **HRMS (ESI-TOF)** Calcd for  $\text{C}_{33}\text{H}_{33}\text{N}_2\text{O}^+$  ( $[\text{M}+\text{H}]^+$ ) 473.2593. Found 473.2602.

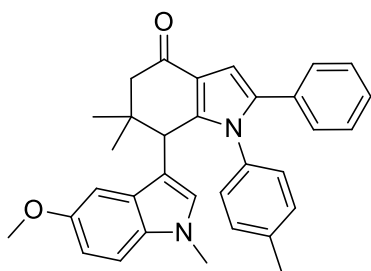

**5-methoxy-1,6',6'-trimethyl-2'-phenyl-1'-(p-tolyl)-6',7'-dihydro-1**

***H,1'H*-[3,7'-biindol]-4'(5'*H*)-one(8e):** purple solid. m. p.: 158-160 °C. **IR** (neat,  $\nu$ ,  $\text{cm}^{-1}$ ): 2951, 2942, 1658, 1511, 1420, 769, 643  $\text{cm}^{-1}$ .  $^1\text{H}$ NMR (400 MHz,  $\text{CDCl}_3$ )  $\delta$  7.24 – 7.00 (m, 8H), 6.89 (s, 3H), 6.63 (d,  $J = 20.0$  Hz, 3H), 3.87 – 3.62 (m, 7H), 2.89 (d,  $J = 17.1$  Hz, 1H), 2.34 – 2.02 (m, 4H), 1.29 (s, 3H), 0.85 (s, 3H).  $^{13}\text{C}$ NMR (101 MHz,  $\text{CDCl}_3$ )  $\delta$  194.6, 153.8, 149.7, 137.8, 136.4, 134.9, 132.2, 132.0, 129.4, 128.2, 128.1, 127.9, 127.8, 127.6, 126.7, 118.9, 112.7, 111.8, 109.8, 105.1, 100.8, 55.9, 47.9, 41.2, 39.3, 33.0, 28.4, 28.2, 21.0. **HRMS (ESI-TOF)** Calcd for  $\text{C}_{33}\text{H}_{33}\text{N}_2\text{O}_2^+$  ( $[\text{M}+\text{H}]^+$ ) 489.2542 . Found 489.2540.

v. Copies of  $^1\text{H}$  and  $^{13}\text{C}$  NMR Spectra for Compounds

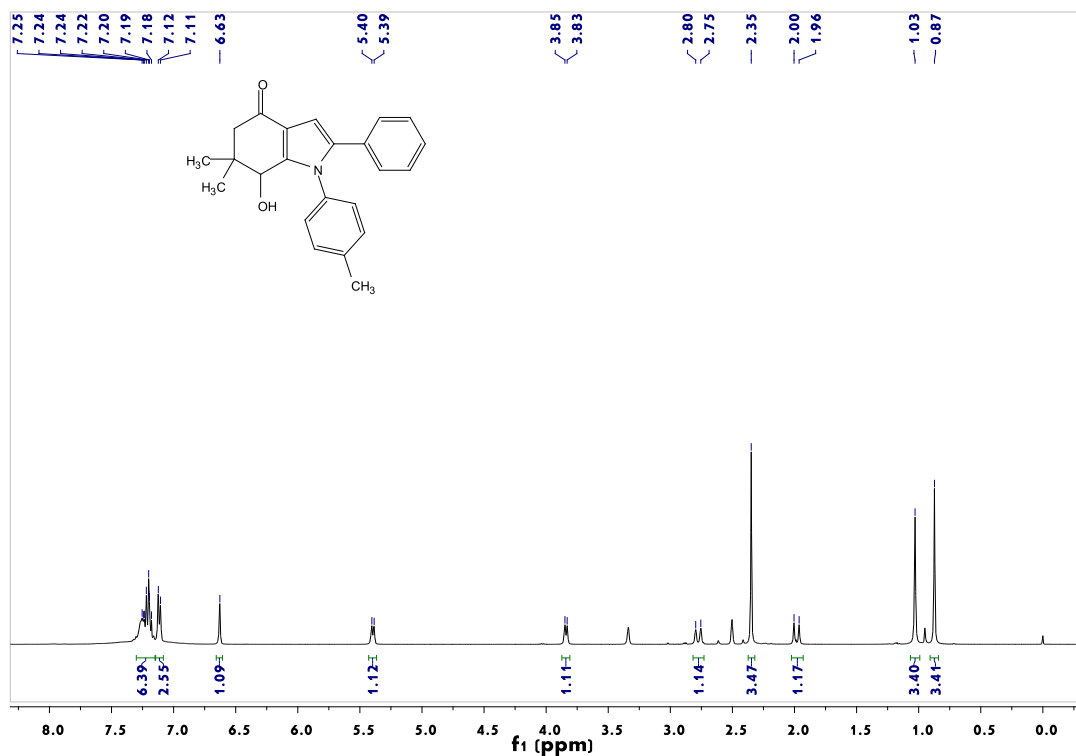

$^1\text{H}$  NMR (400 MHz, DMSO) for 3a

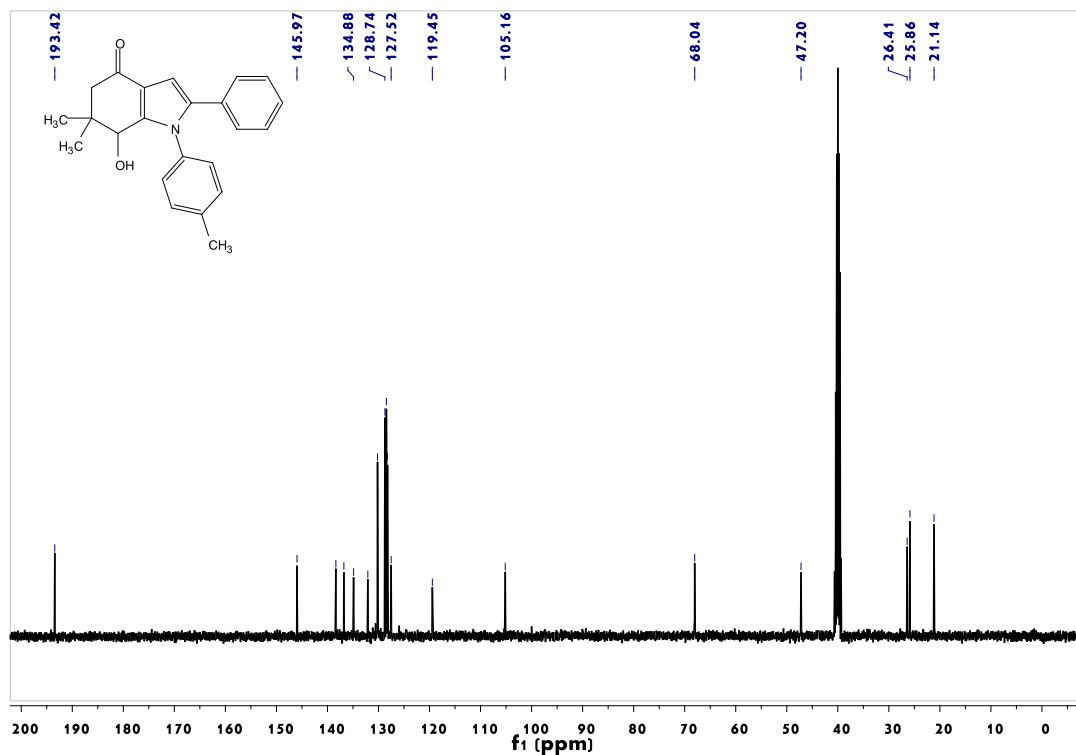

$^{13}\text{C}$  NMR (400 MHz, DMSO) for 3a

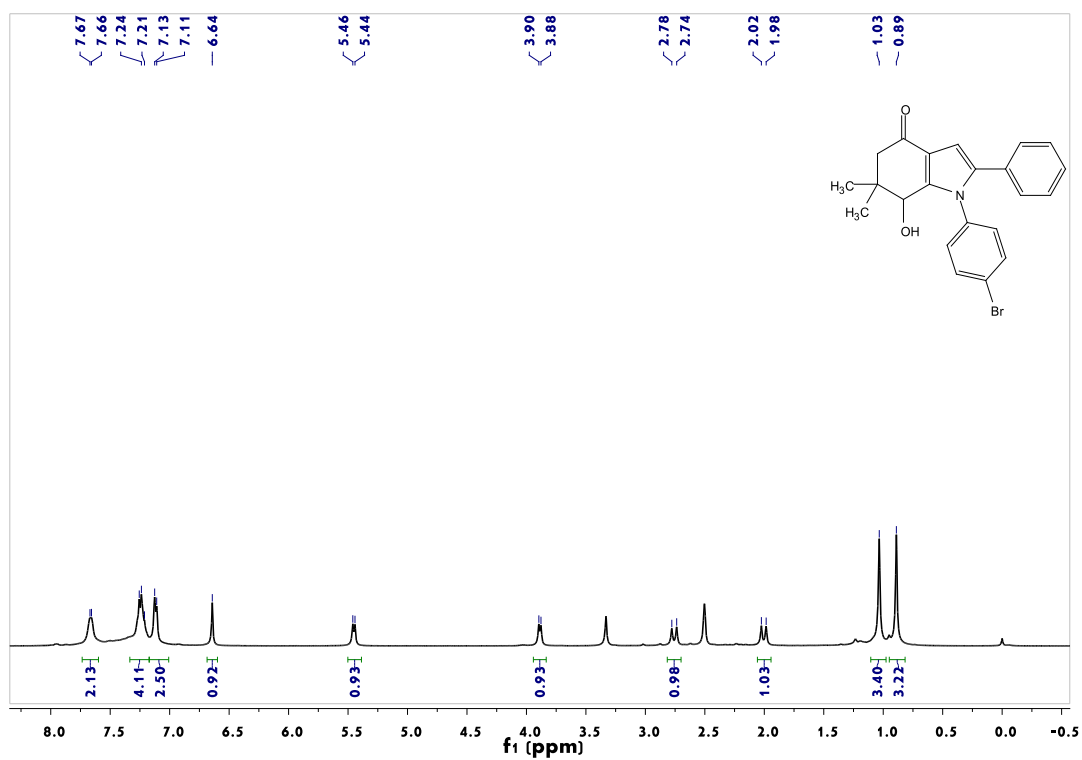

<sup>1</sup>H NMR (400 MHz, DMSO) for 3b

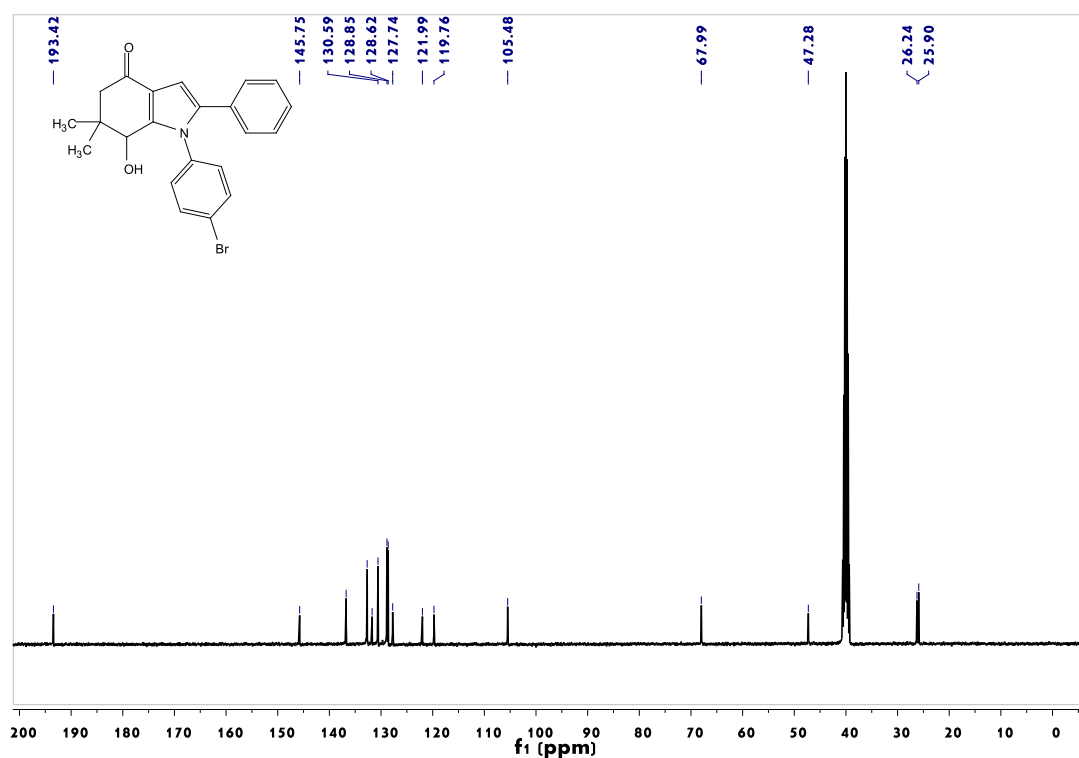

<sup>13</sup>C NMR (400 MHz, DMSO) for 3b

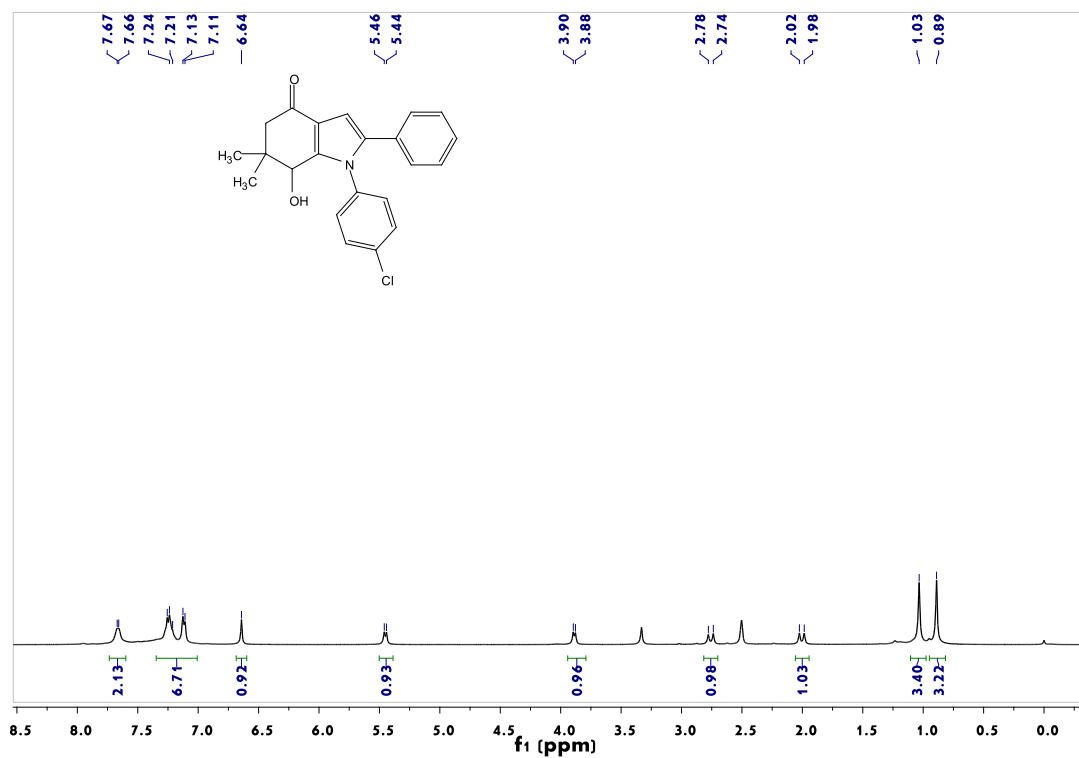

<sup>1</sup>H NMR (400 MHz, DMSO) for 3c

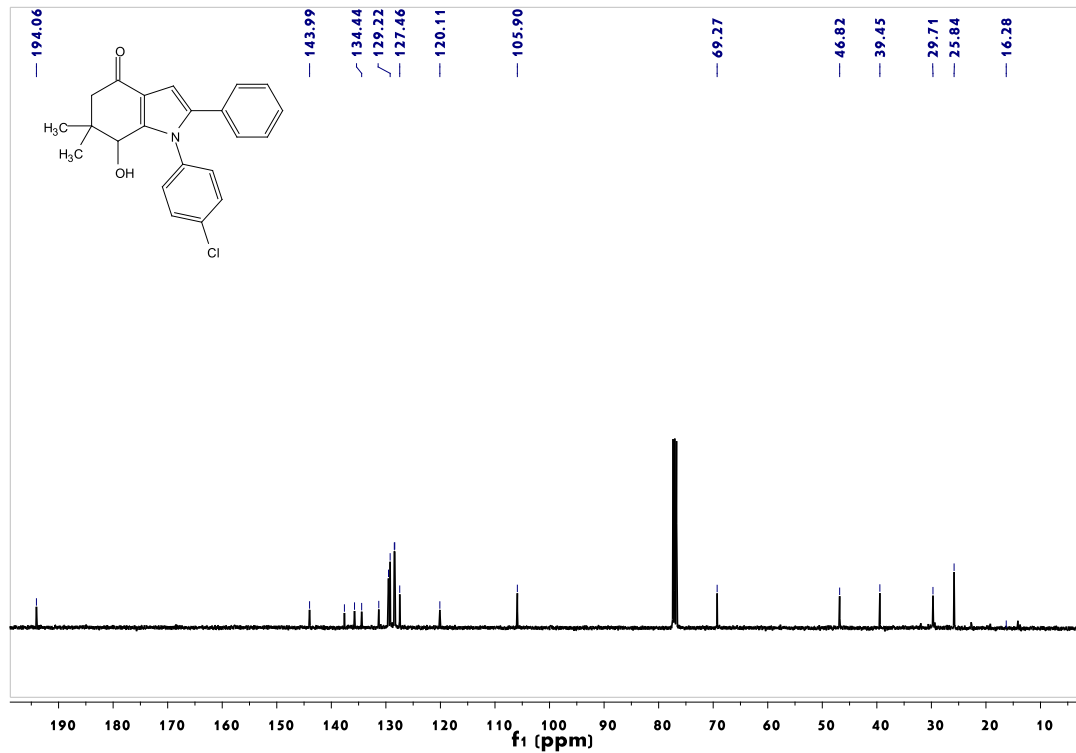

<sup>13</sup>C NMR (400 MHz, CDCl<sub>3</sub>) for 3c



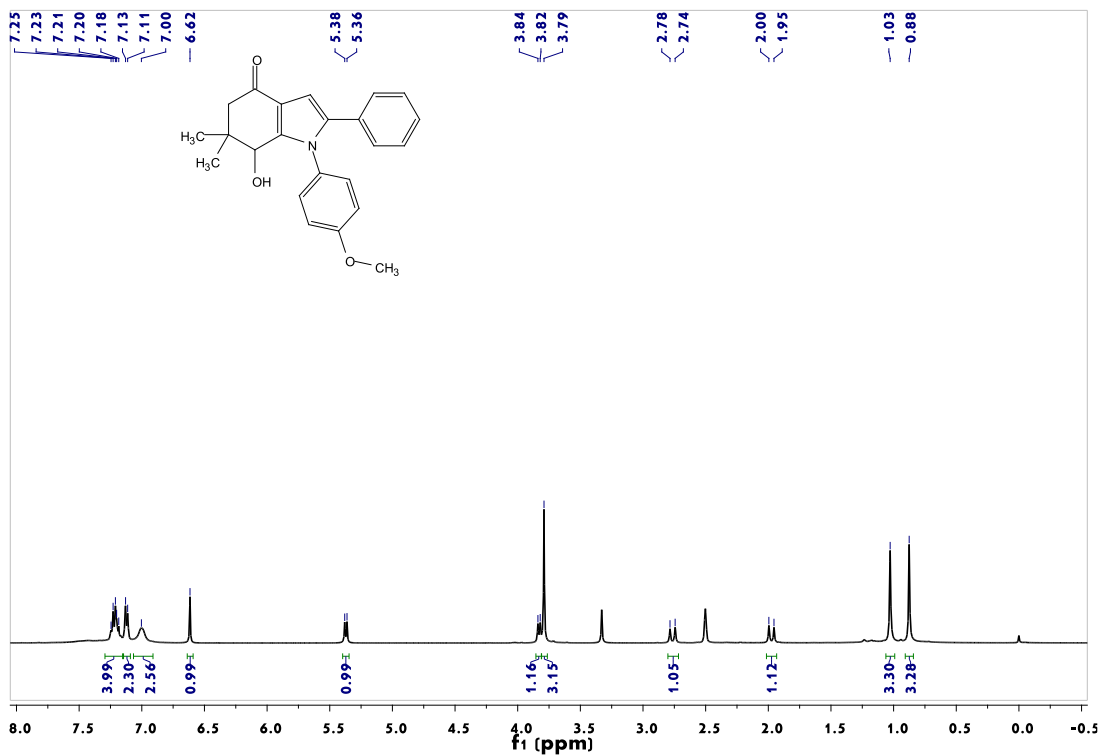

**<sup>1</sup>H NMR (400 MHz, DMSO) for 3d**

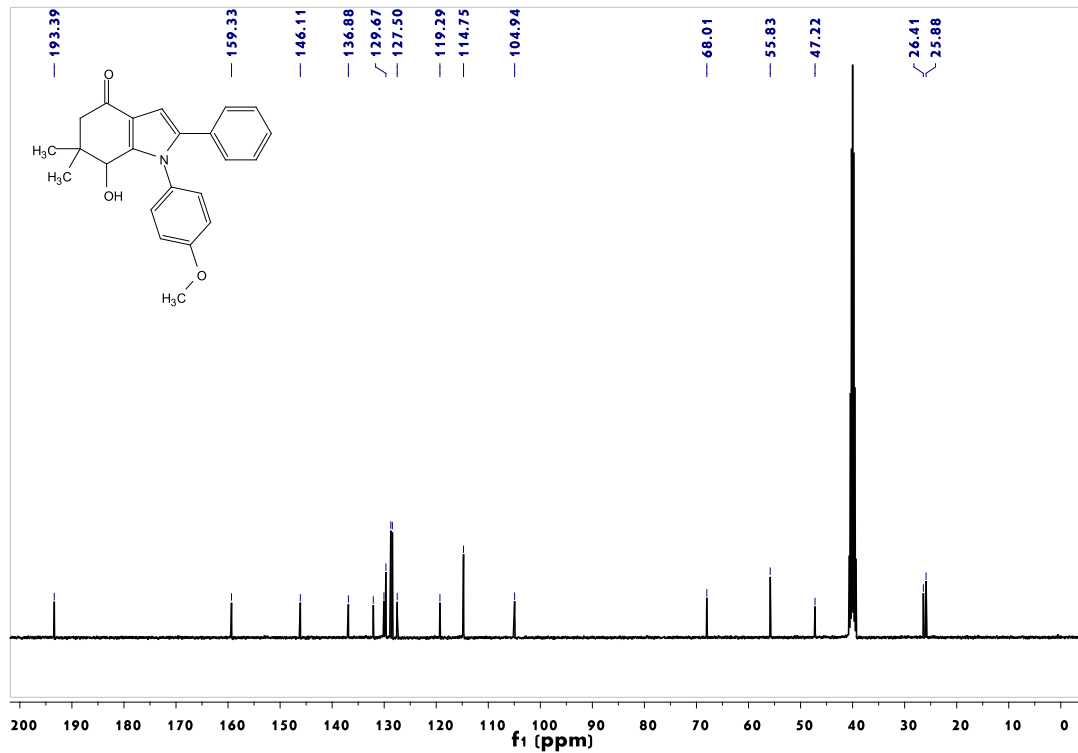

**<sup>13</sup>C NMR (400 MHz, DMSO) for 3d**

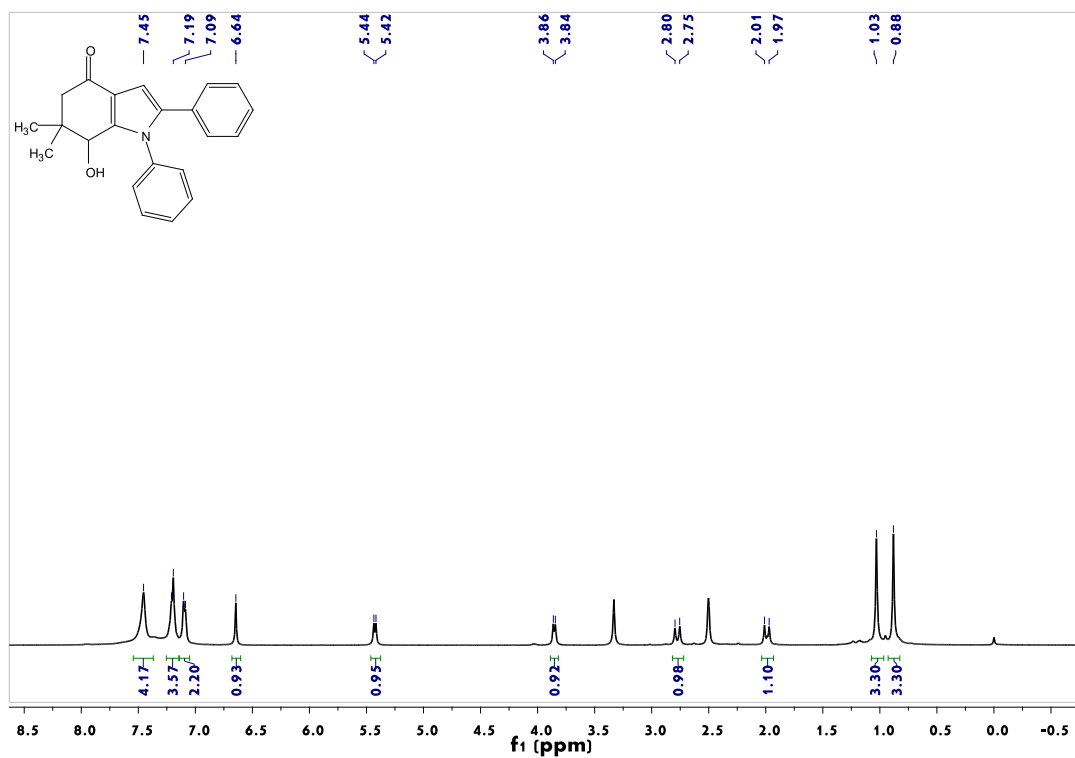

**<sup>1</sup>H NMR (400 MHz, DMSO) for 3e**

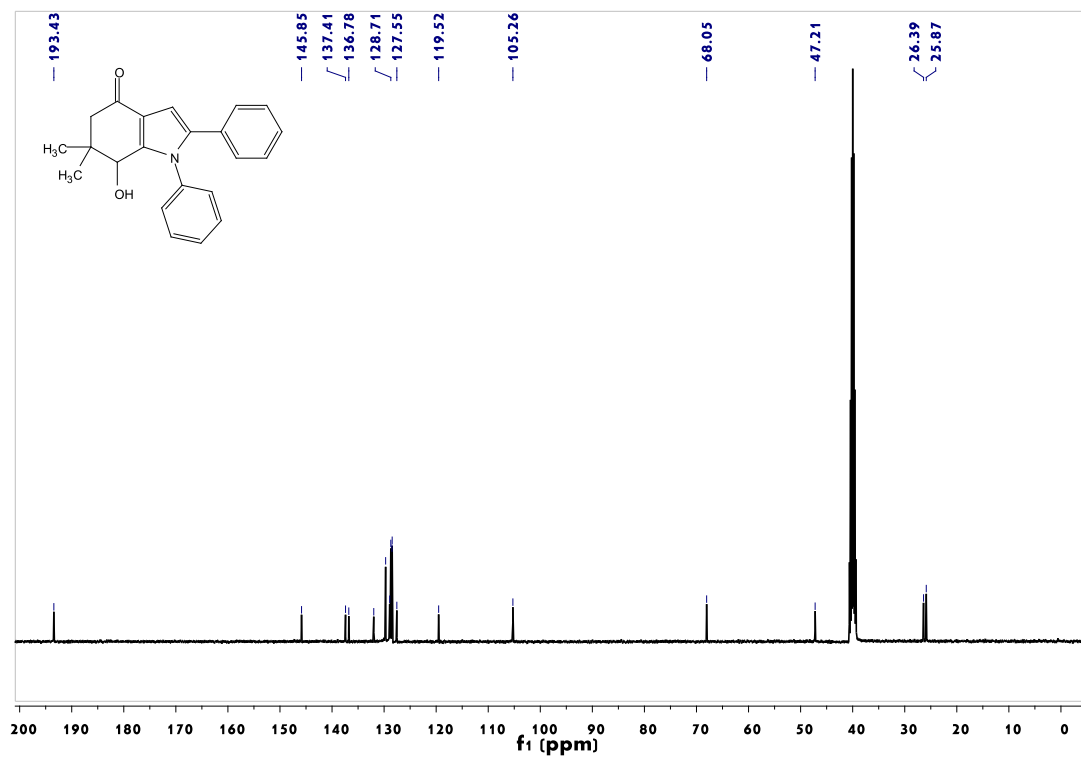

**<sup>13</sup>C NMR (400 MHz, DMSO) for 3e**

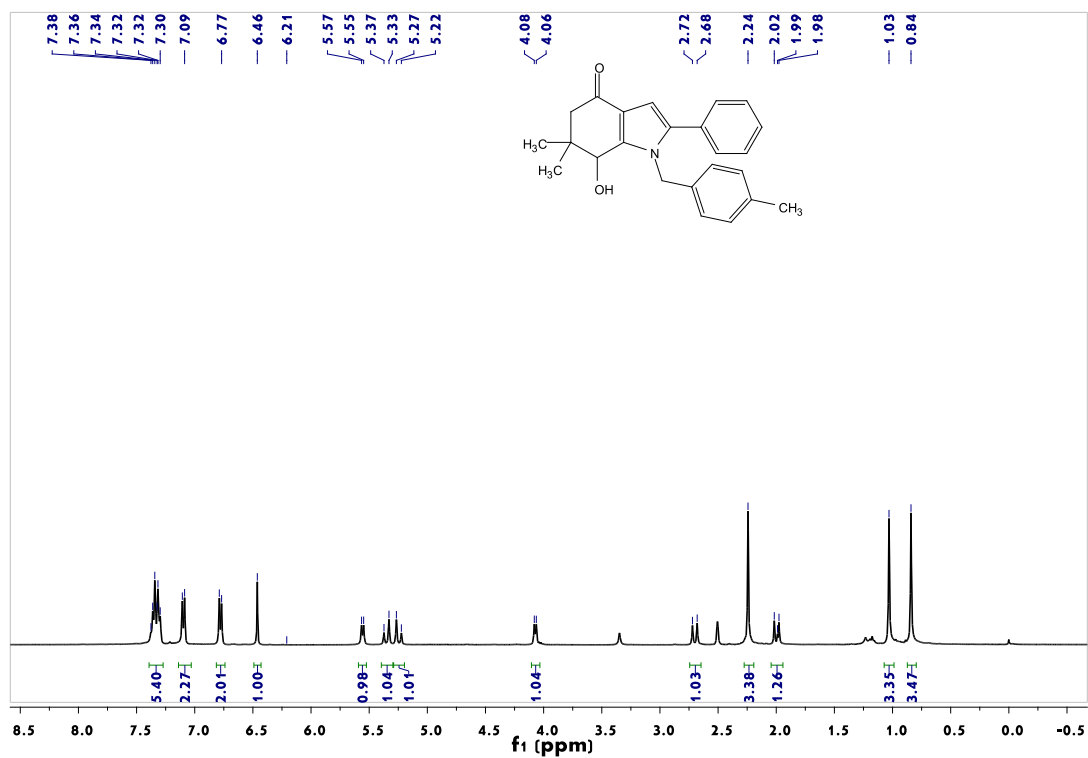

<sup>1</sup>H NMR (400 MHz, DMSO) for 3f

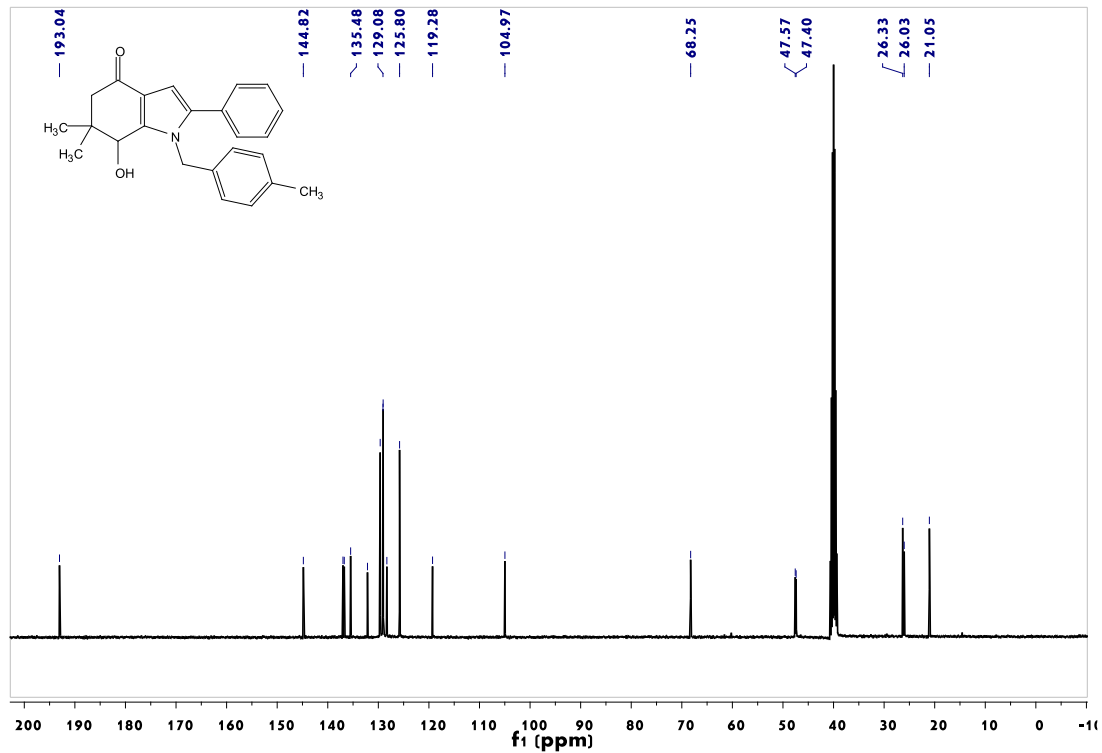

<sup>13</sup>C NMR (400 MHz, DMSO) for 3f

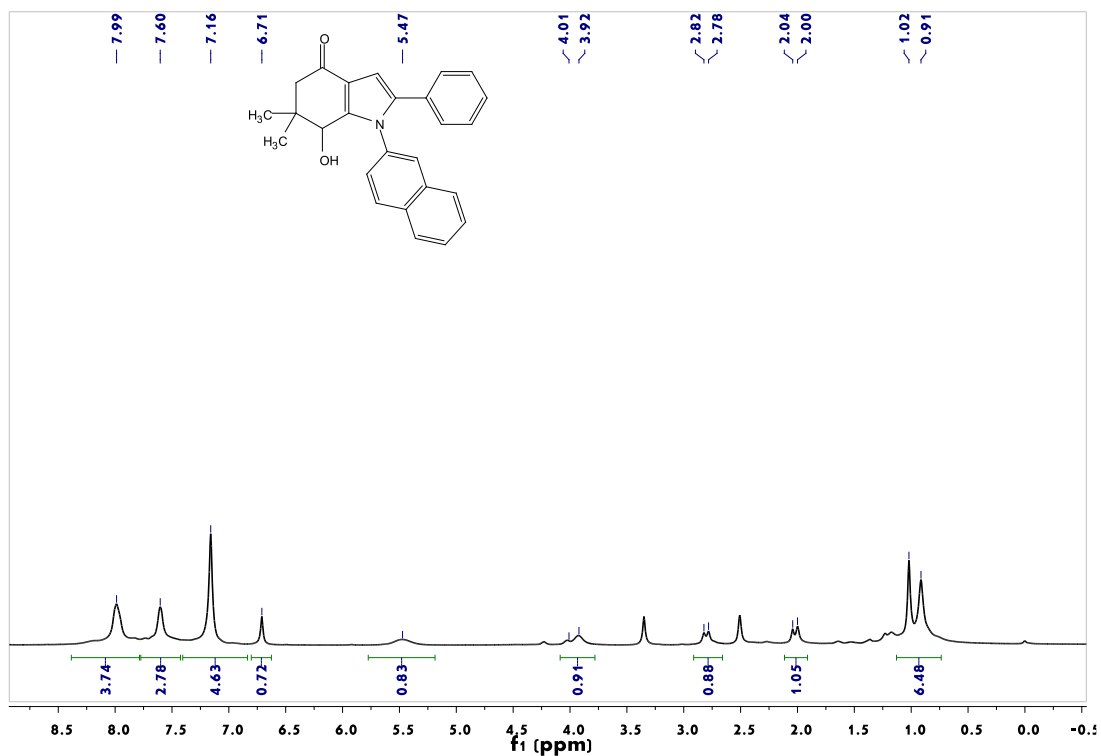

**<sup>1</sup>H NMR (400 MHz, DMSO) for 3g**

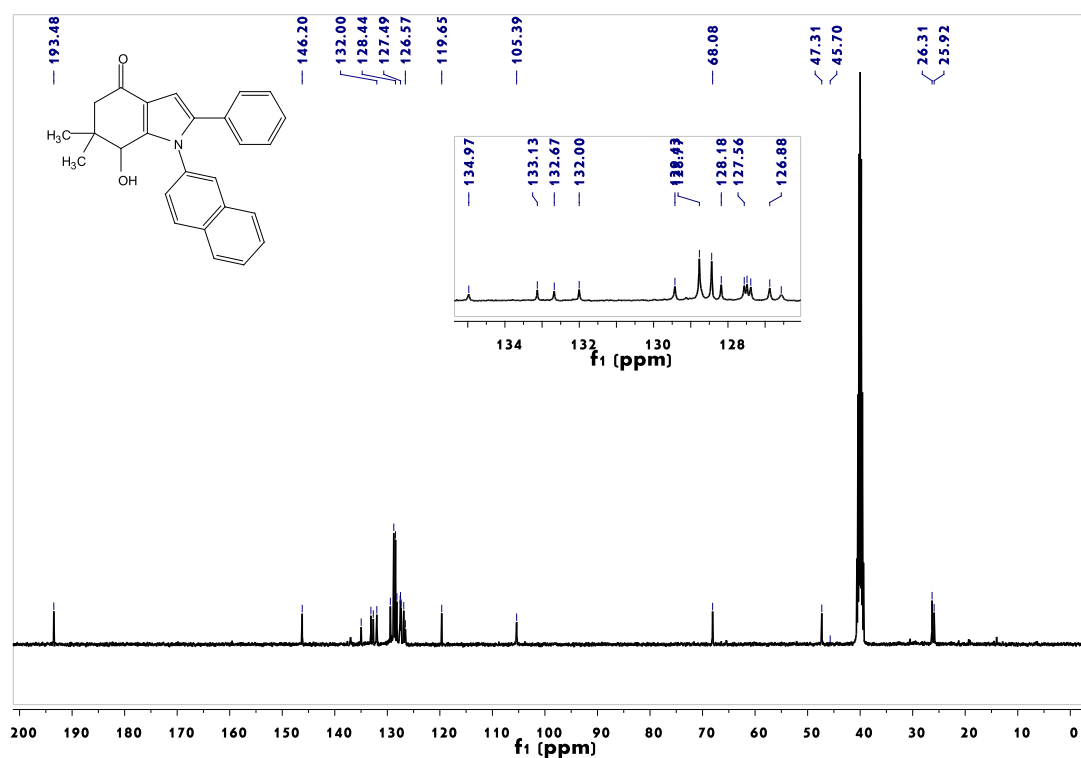

**<sup>13</sup>C NMR (400 MHz, DMSO) for 3g**

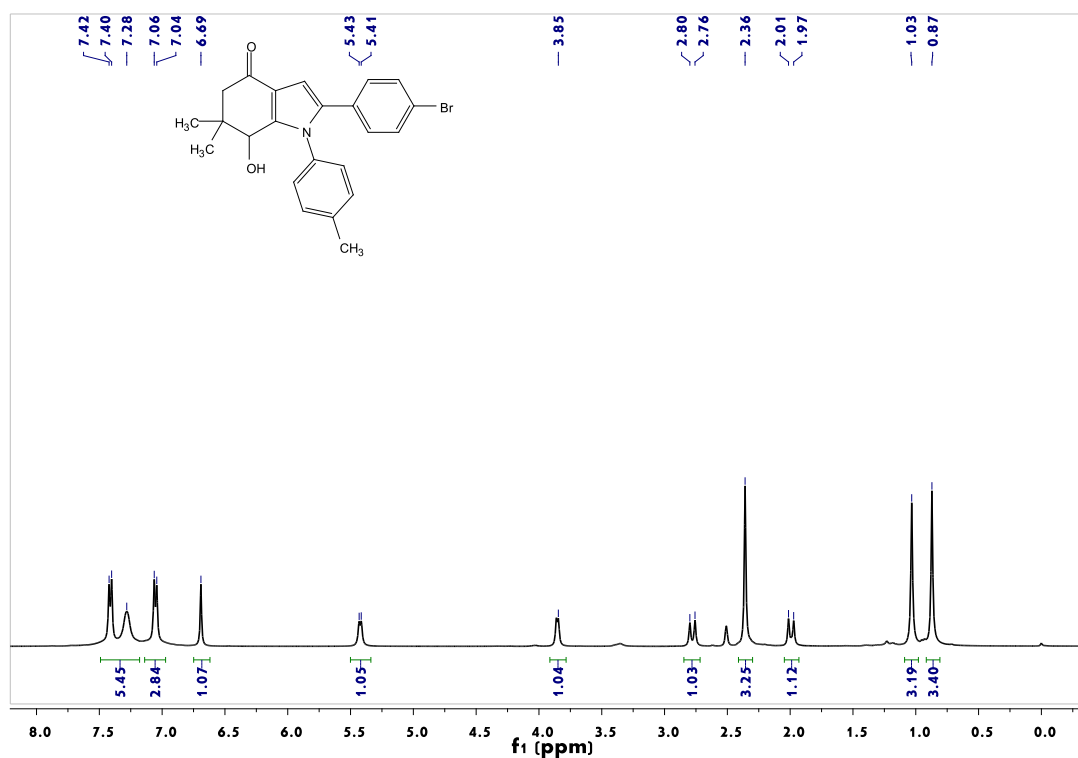

**<sup>1</sup>H NMR (400 MHz, DMSO) for 3h**

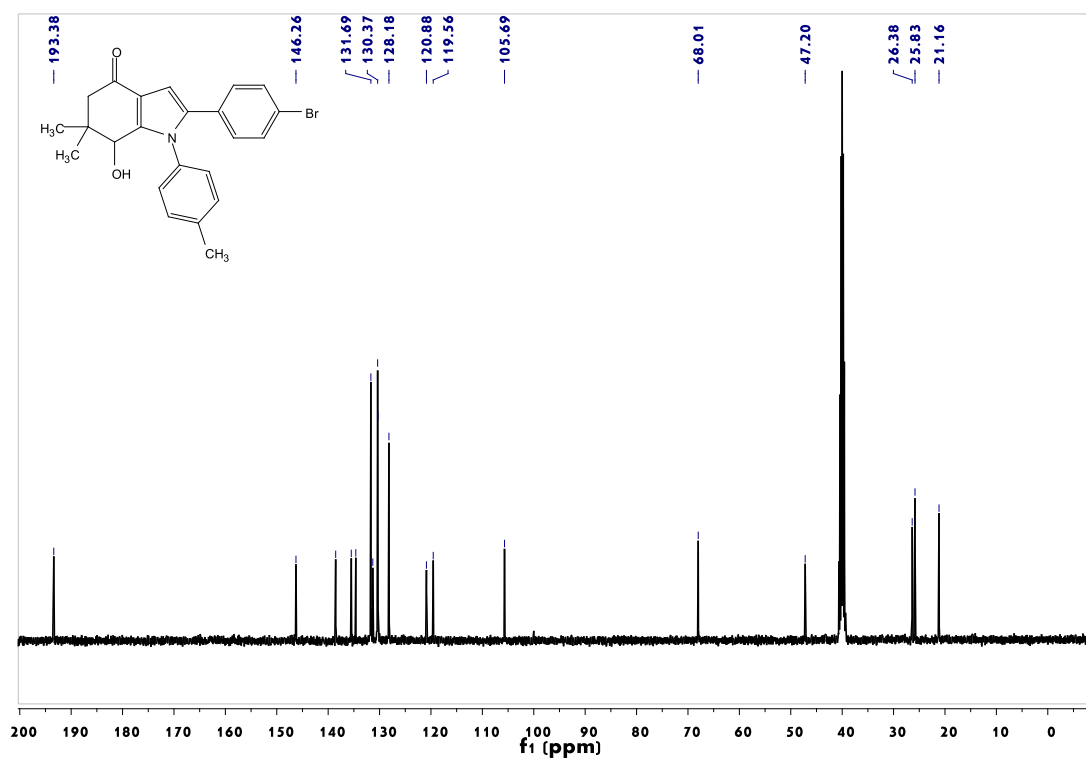

**<sup>13</sup>C NMR (400 MHz, DMSO) for 3h**

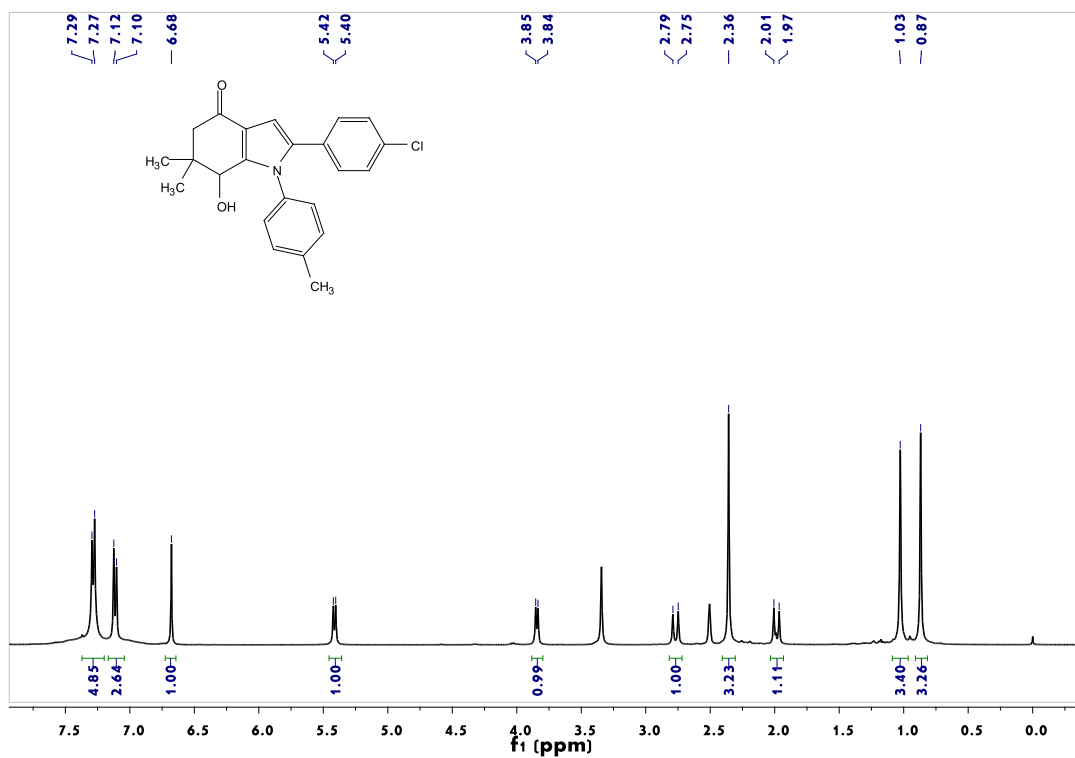

<sup>1</sup>H NMR (400 MHz, DMSO) for **3i**

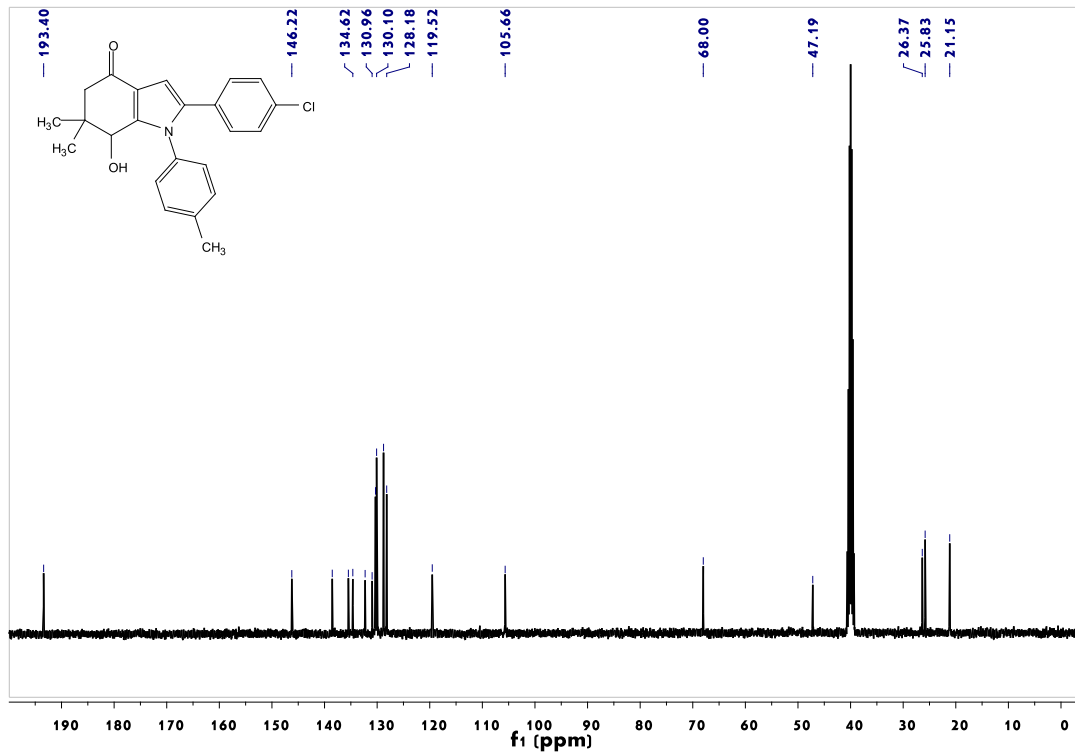

<sup>13</sup>C NMR (400 MHz, DMSO) for **3i**

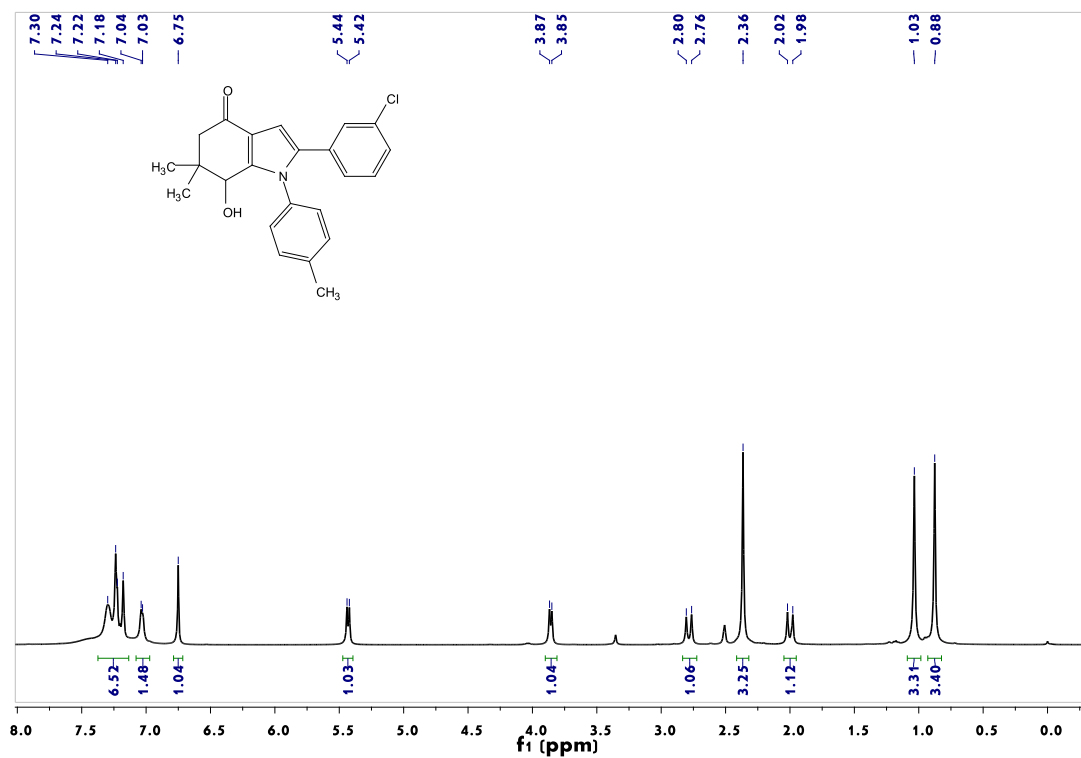

**<sup>1</sup>H NMR (400 MHz, DMSO) for 3j**

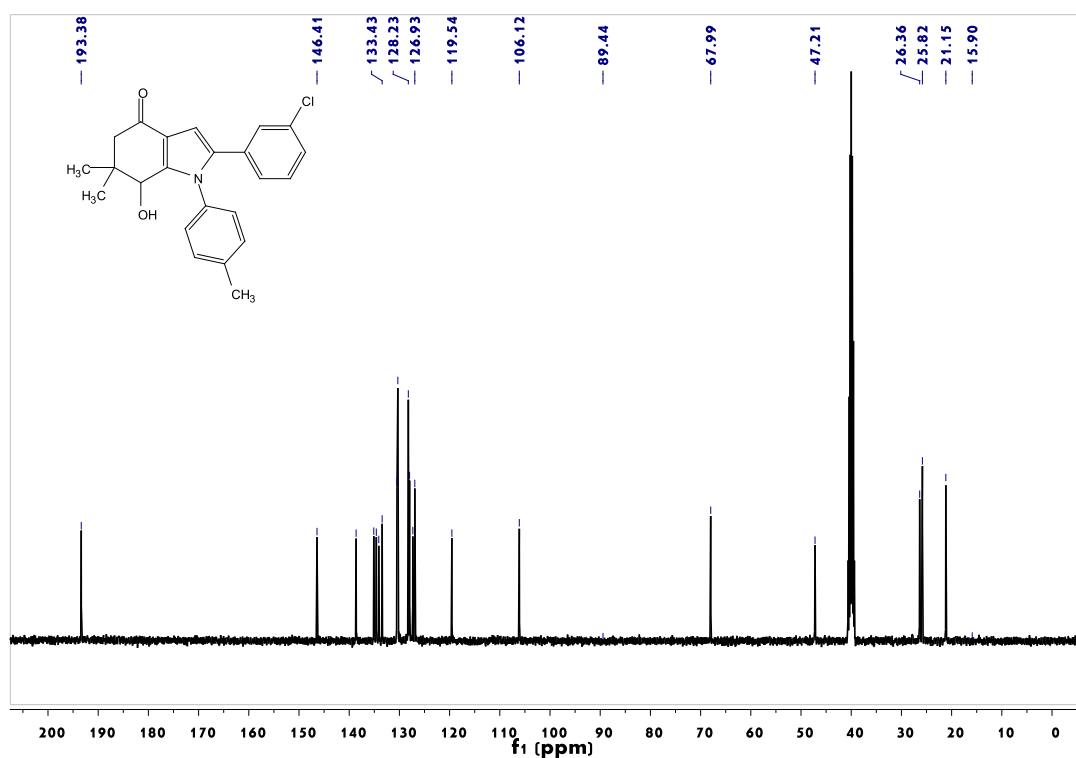

**<sup>13</sup>C NMR (400 MHz, DMSO) for 3j**

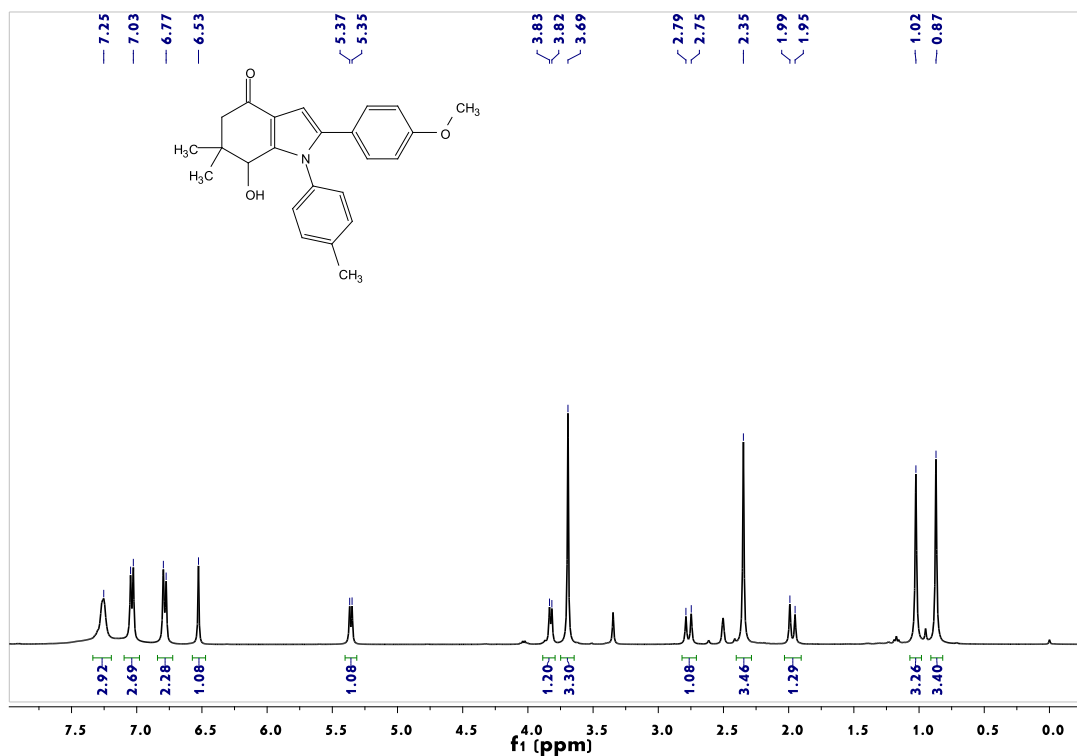

**<sup>1</sup>H NMR (400 MHz, DMSO) for 3k**

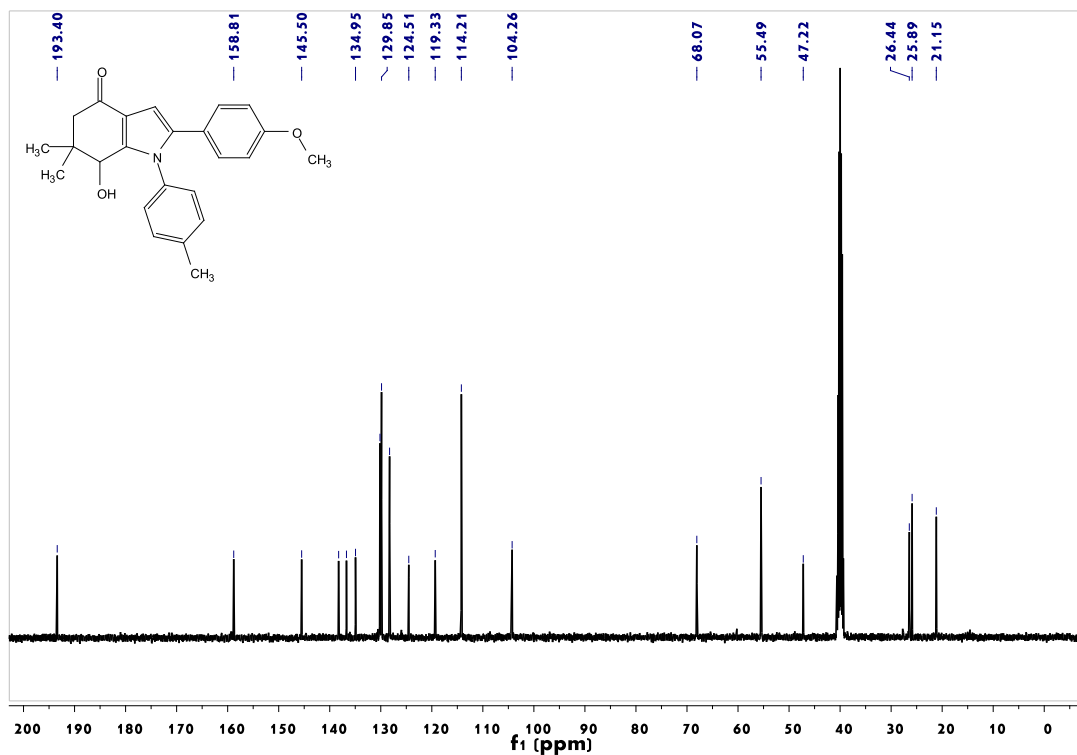

**<sup>13</sup>C NMR (400 MHz, DMSO) for 3k**



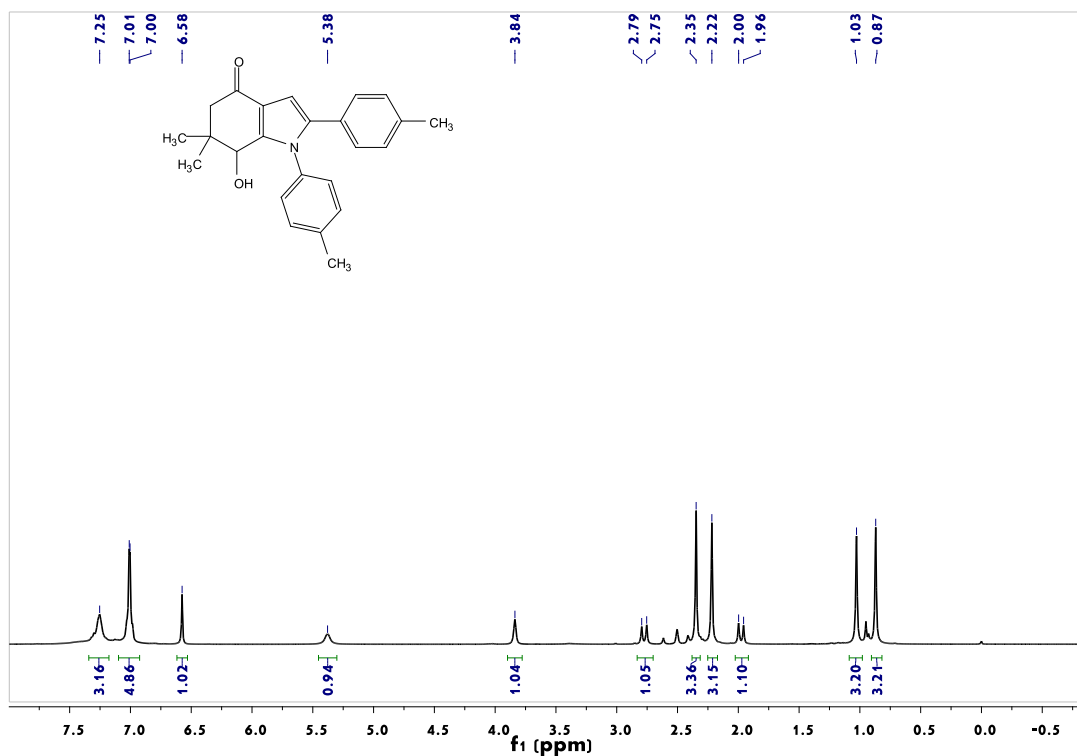

$^1\text{H}$  NMR (400 MHz, DMSO) for **3I**

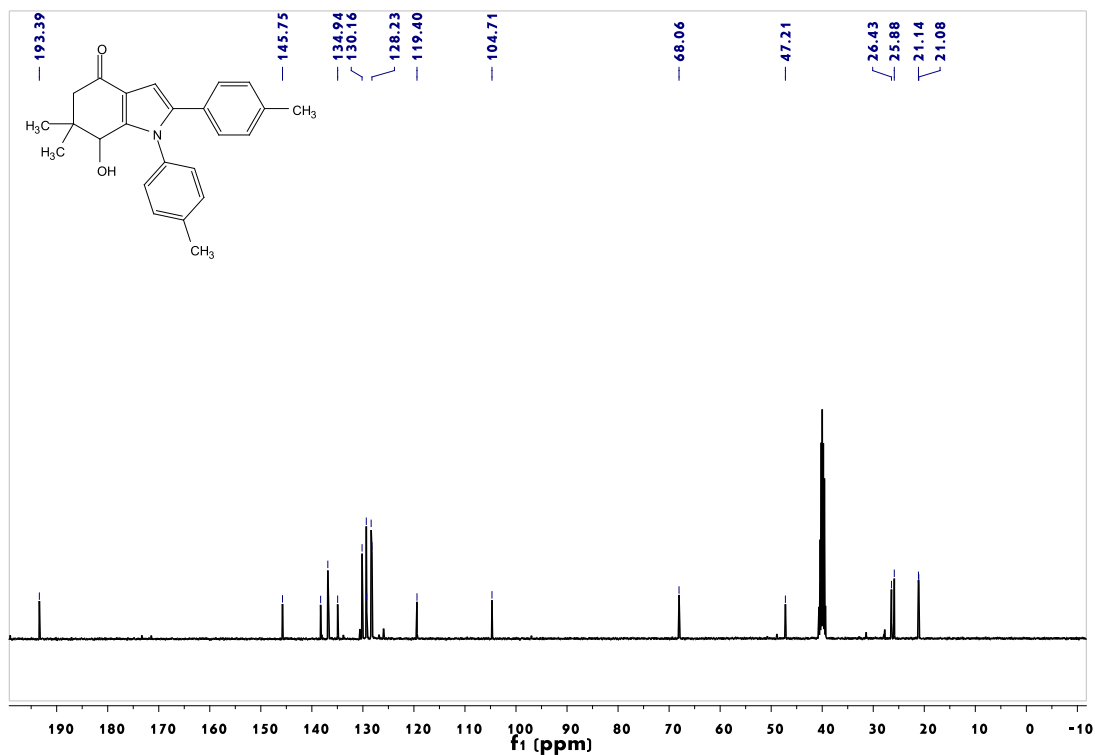

$^{13}\text{C}$  NMR (400 MHz, DMSO) for **3I**

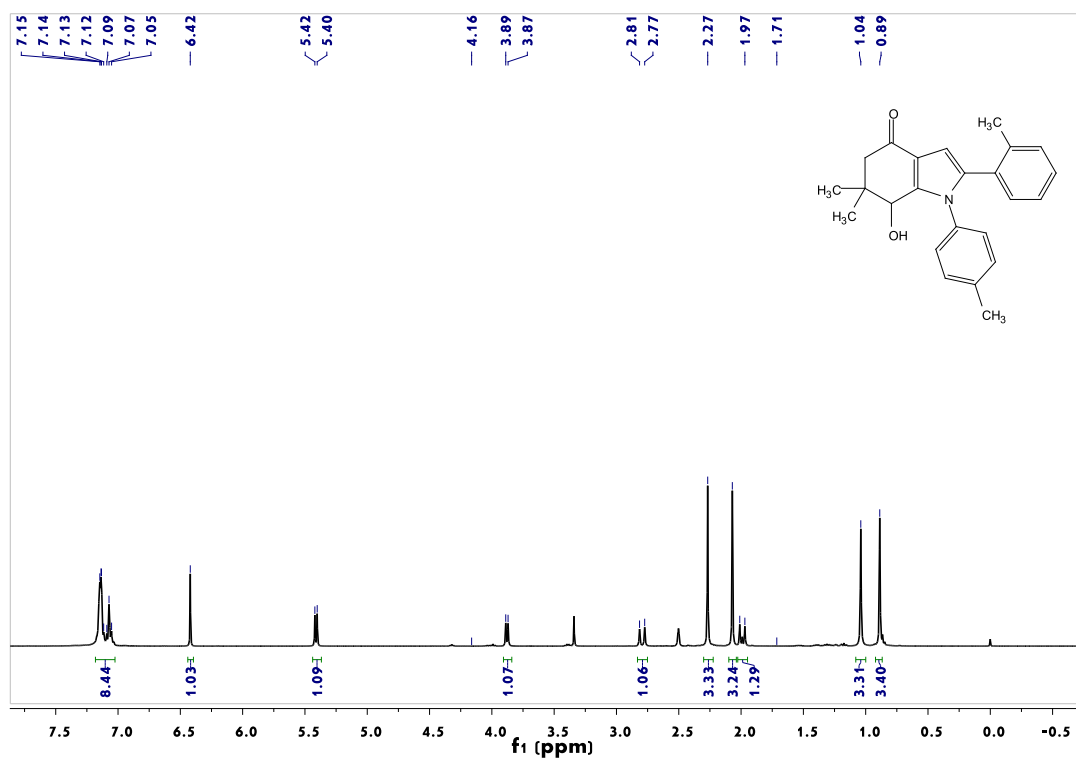

**<sup>1</sup>H NMR (400 MHz, DMSO) for 3m**

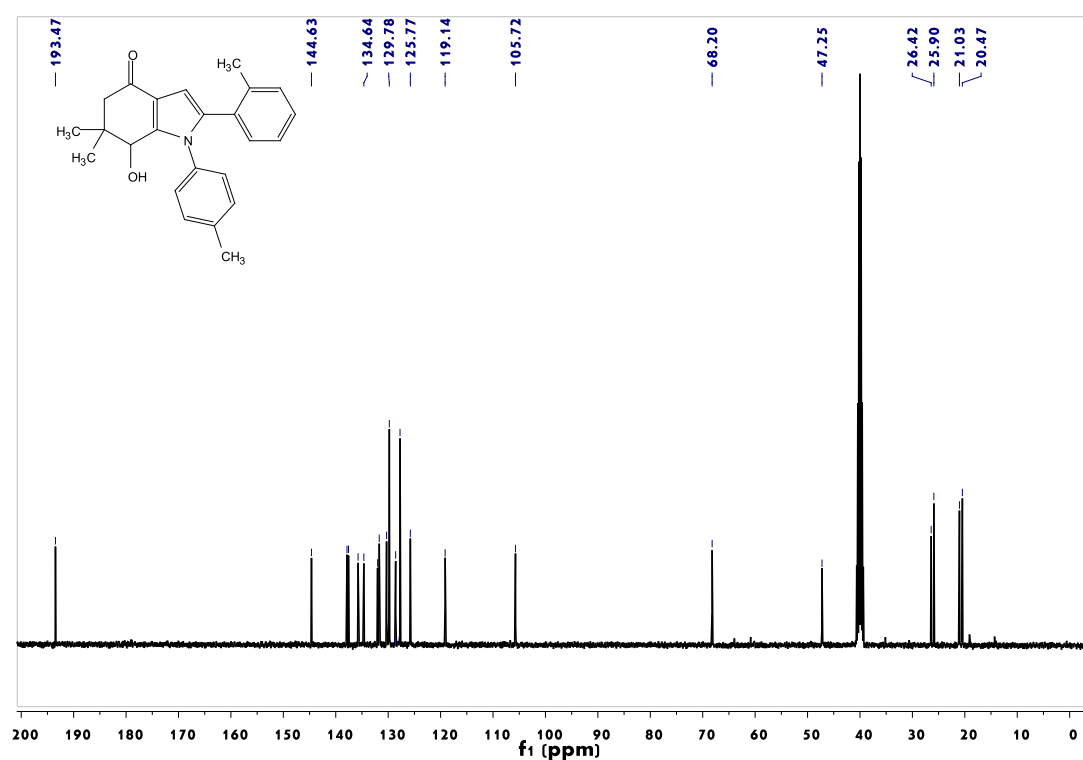

**<sup>13</sup>C NMR (400 MHz, DMSO) for 3m**

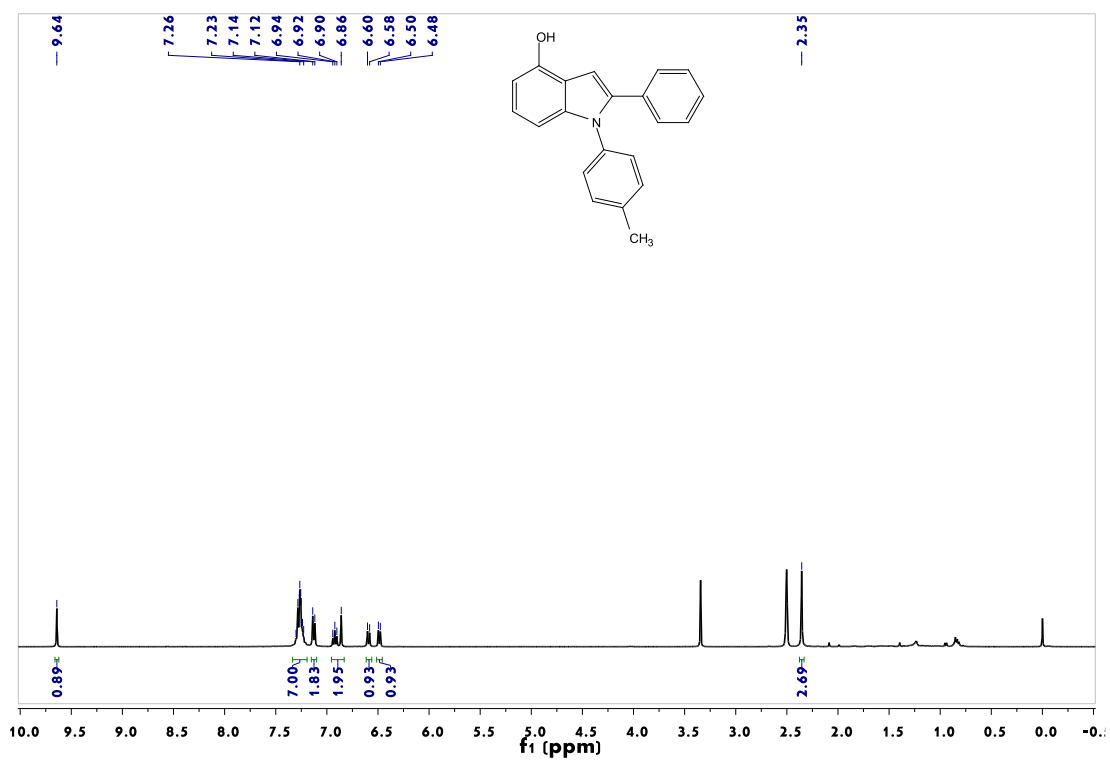

<sup>1</sup>H NMR (400 MHz, DMSO) for 5a

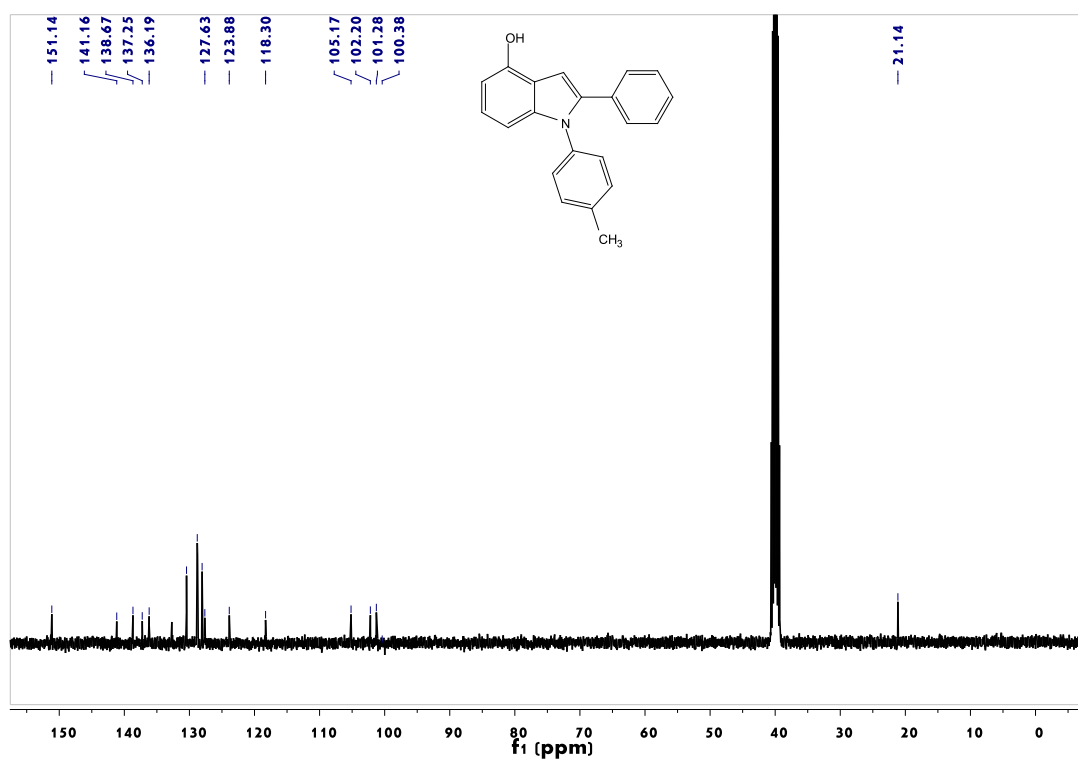

<sup>13</sup>C NMR (400 MHz, DMSO) for 5a

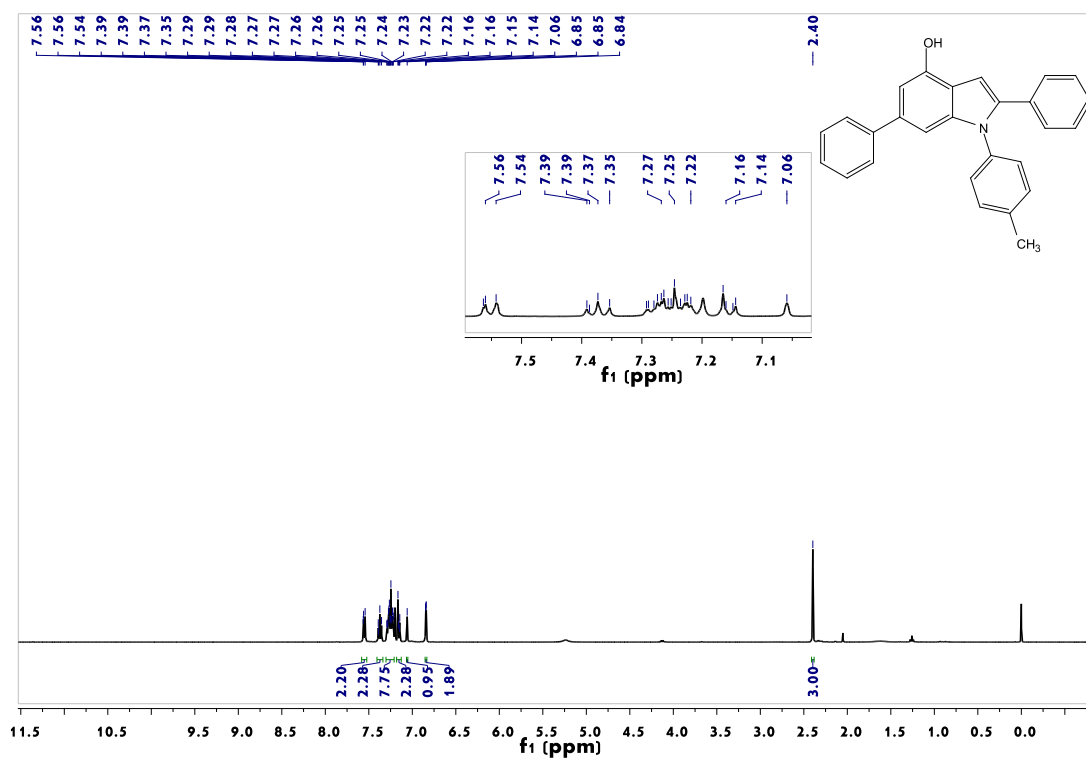

**<sup>1</sup>H NMR (400 MHz, CDCl<sub>3</sub>) for 5b**

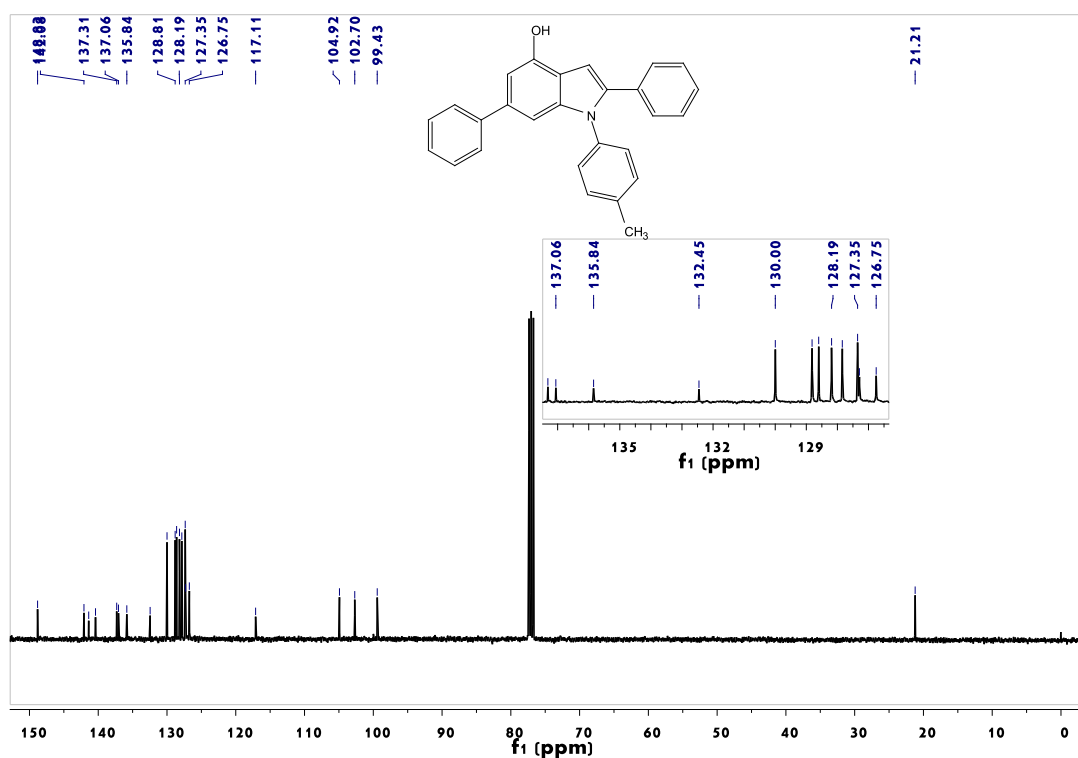

**<sup>13</sup>C NMR (400 MHz, CDCl<sub>3</sub>) for 5b**

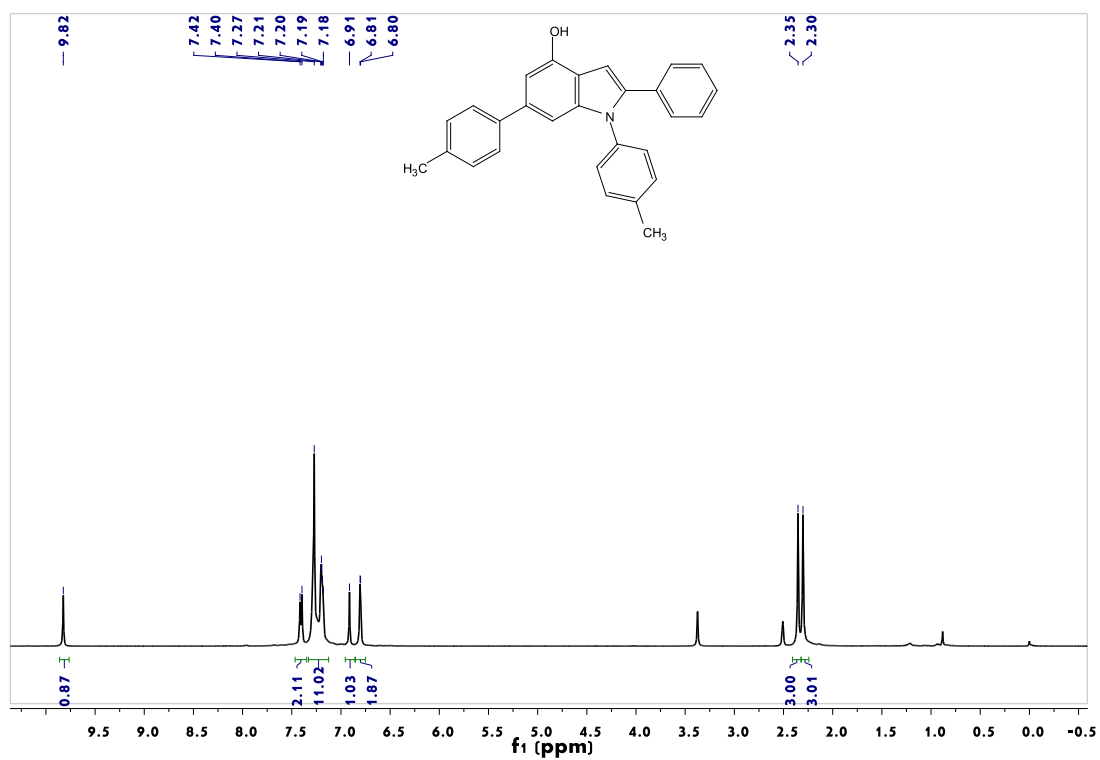

<sup>1</sup>H NMR (400 MHz, DMSO) for 5c

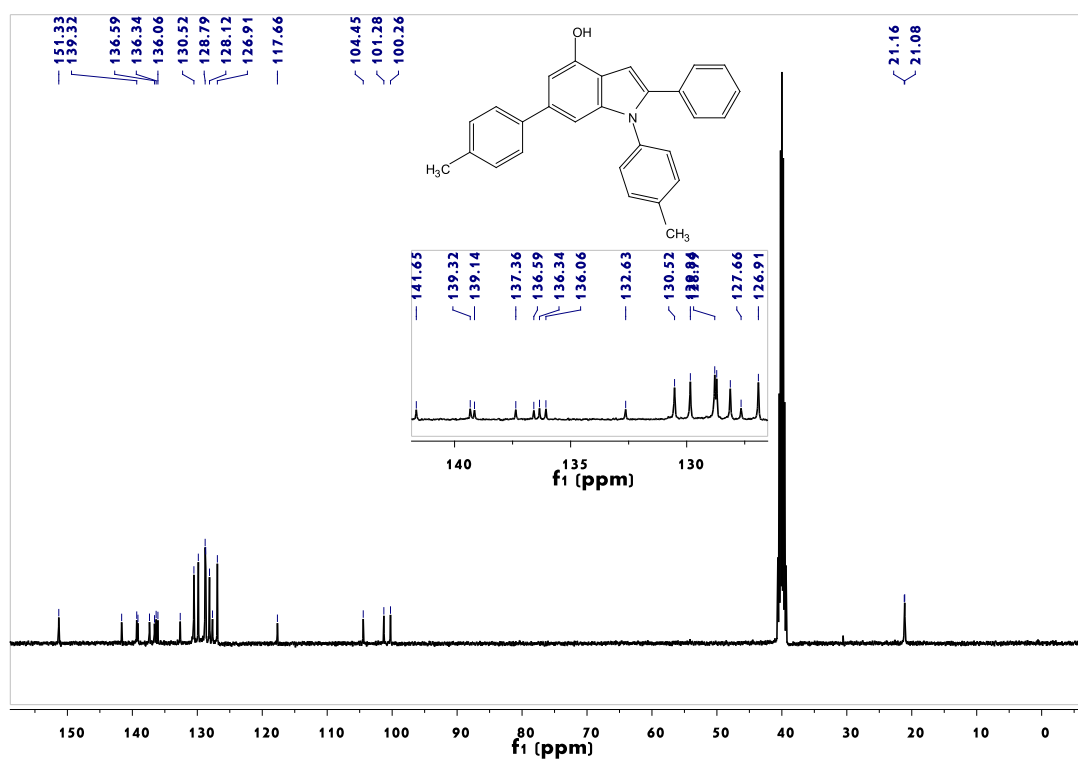

<sup>13</sup>C NMR (400 MHz, DMSO) for 5c

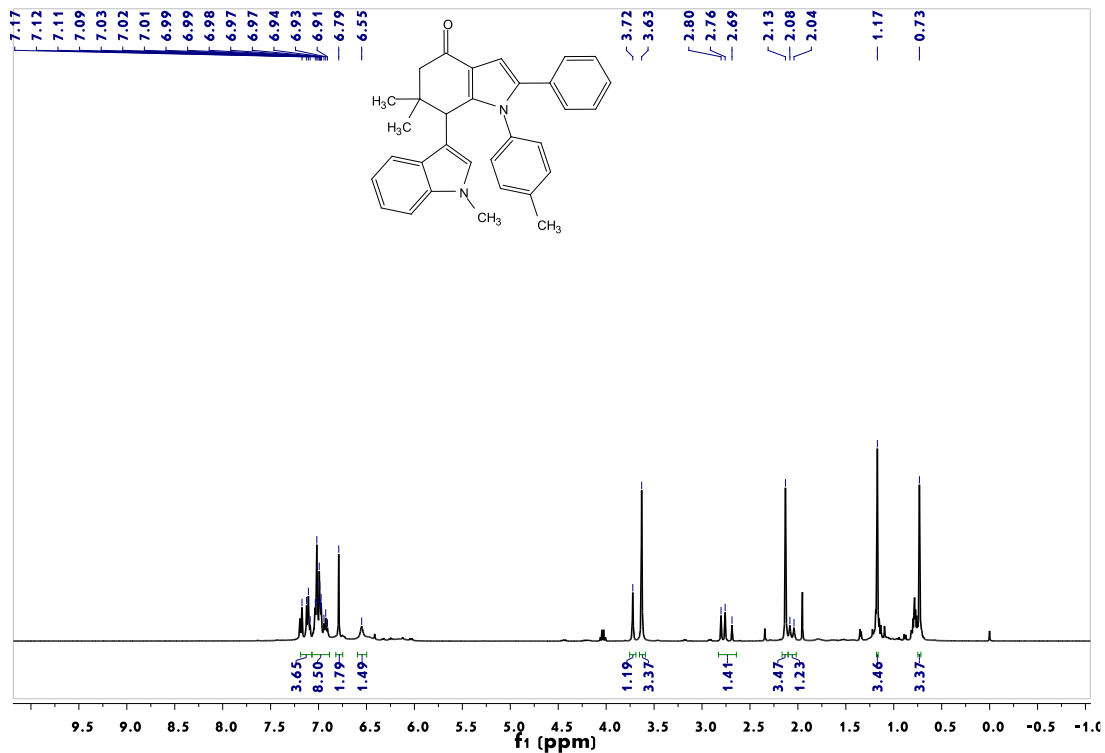

<sup>1</sup>H NMR (400 MHz, CDCl<sub>3</sub>) for **8a**

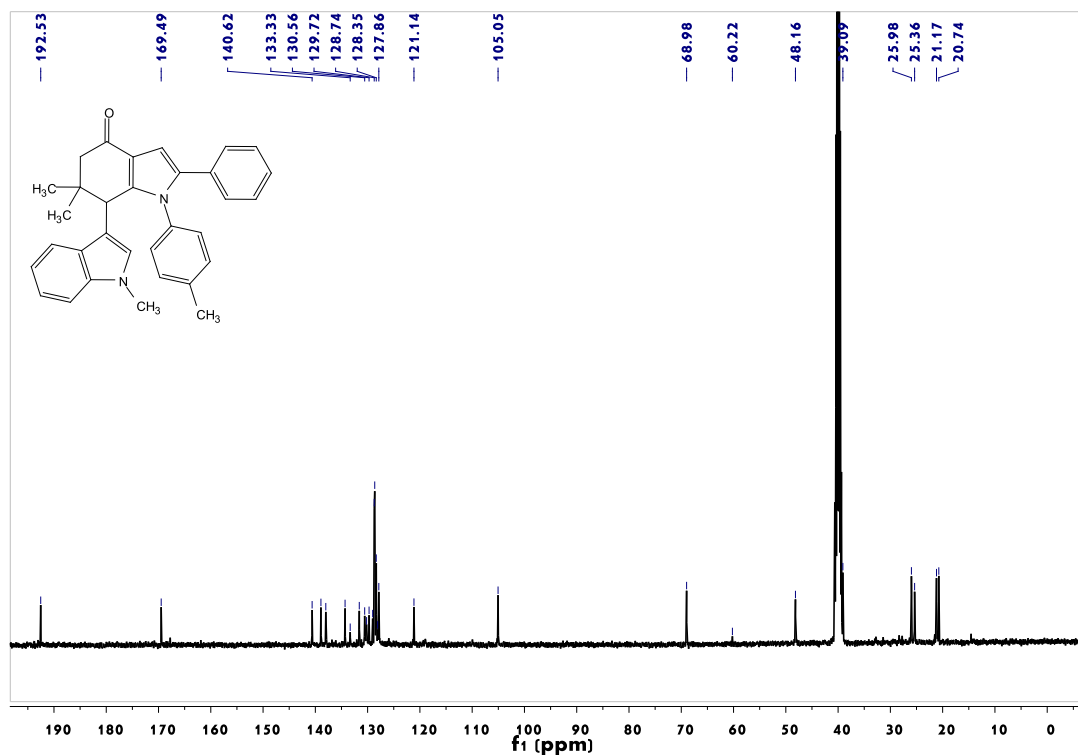

<sup>13</sup>C NMR (400 MHz, DMSO) for **8a**

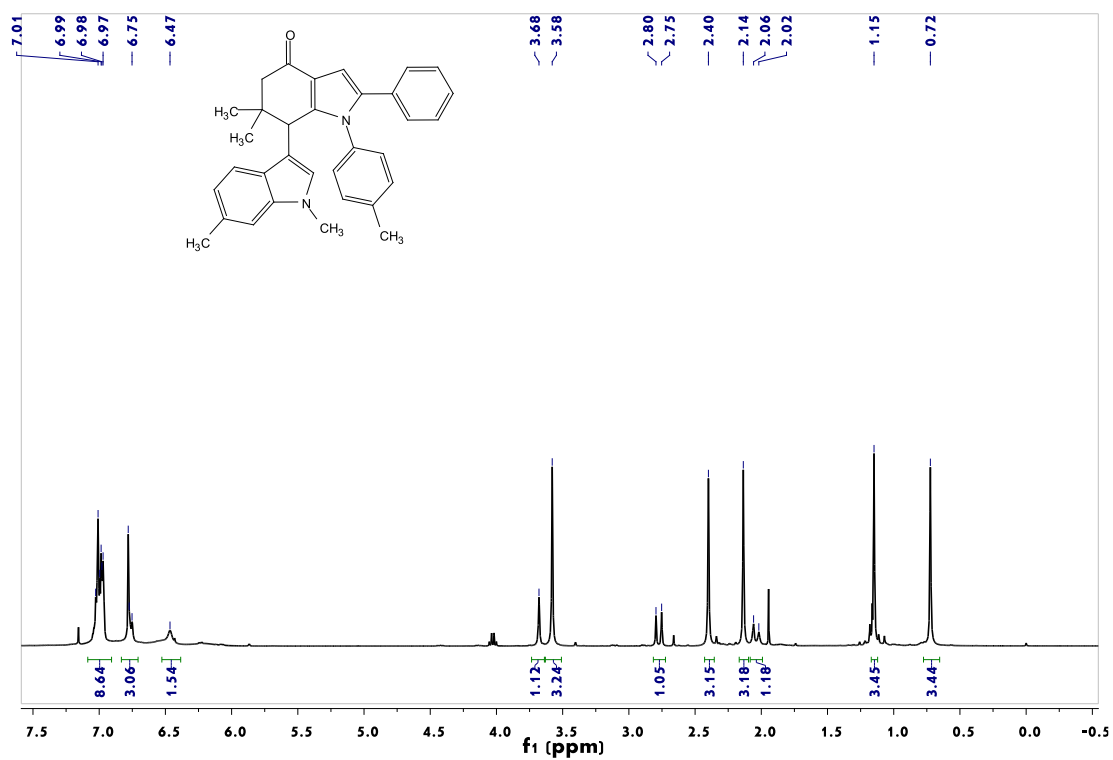

$^1H$  NMR (400 MHz,  $CDCl_3$ ) for **8b**

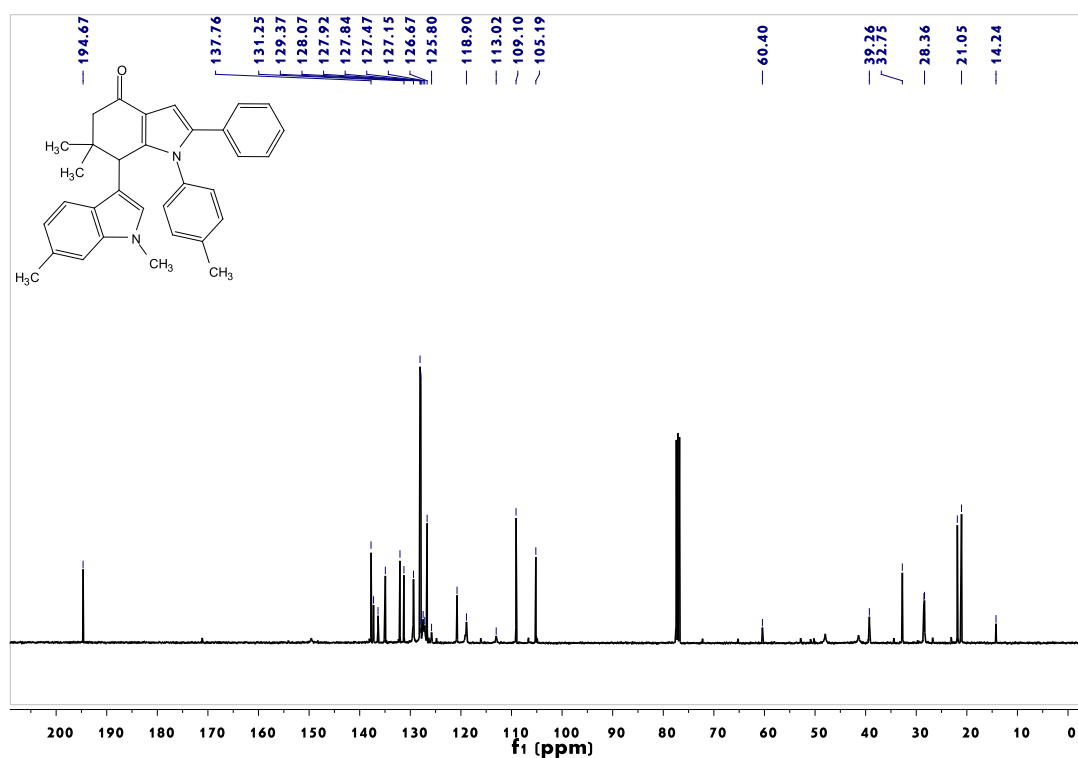

$^{13}C$  NMR (400 MHz,  $CDCl_3$ ) for **8b**

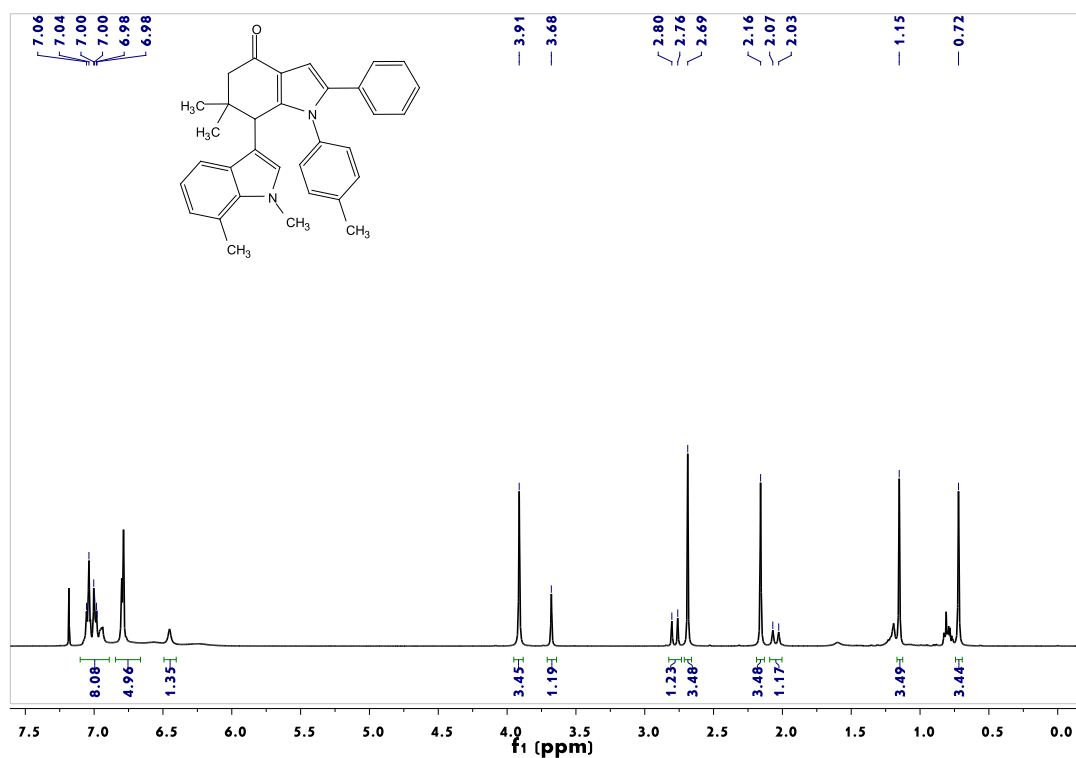

**<sup>1</sup>H NMR (400 MHz, CDCl<sub>3</sub>) for 8c**

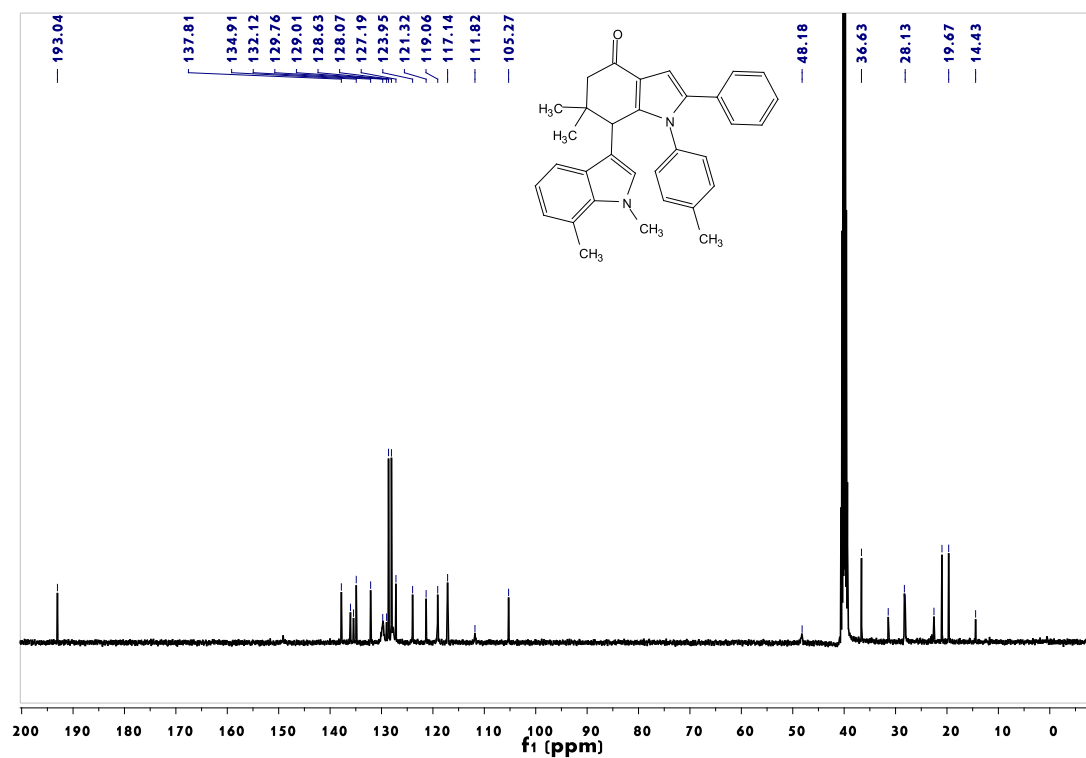

**<sup>13</sup>C NMR (400 MHz, DMSO) for 8c**



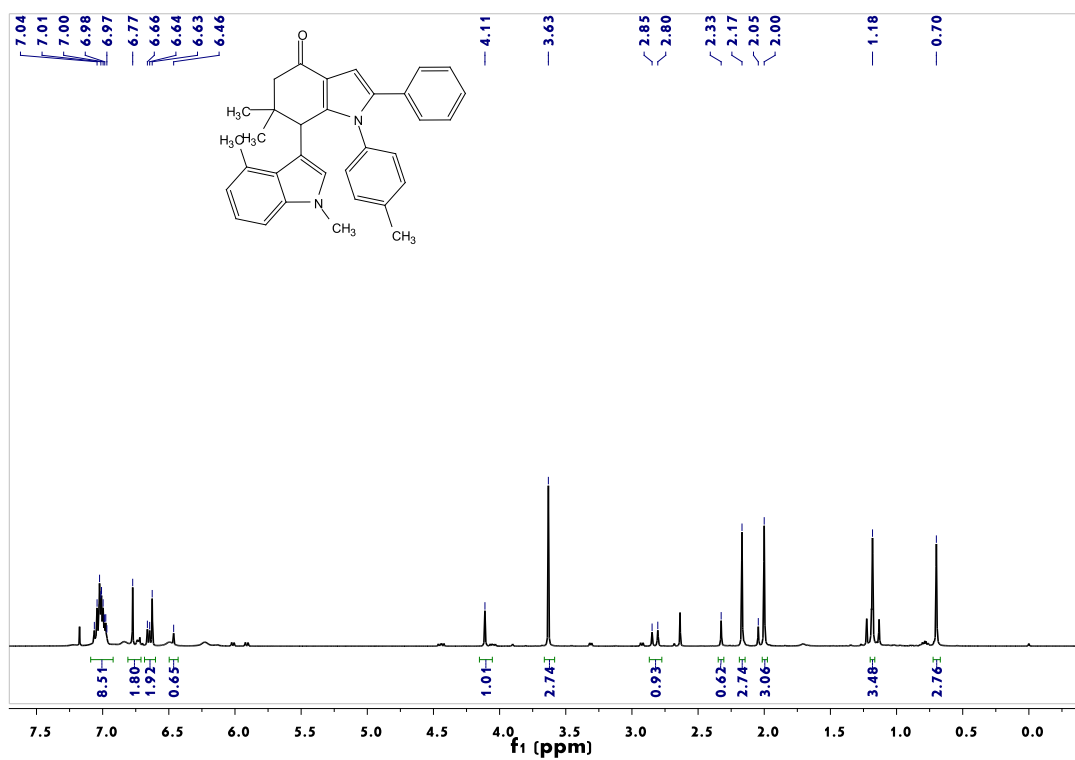

<sup>1</sup>H NMR (400 MHz, CDCl<sub>3</sub>) for **8d**

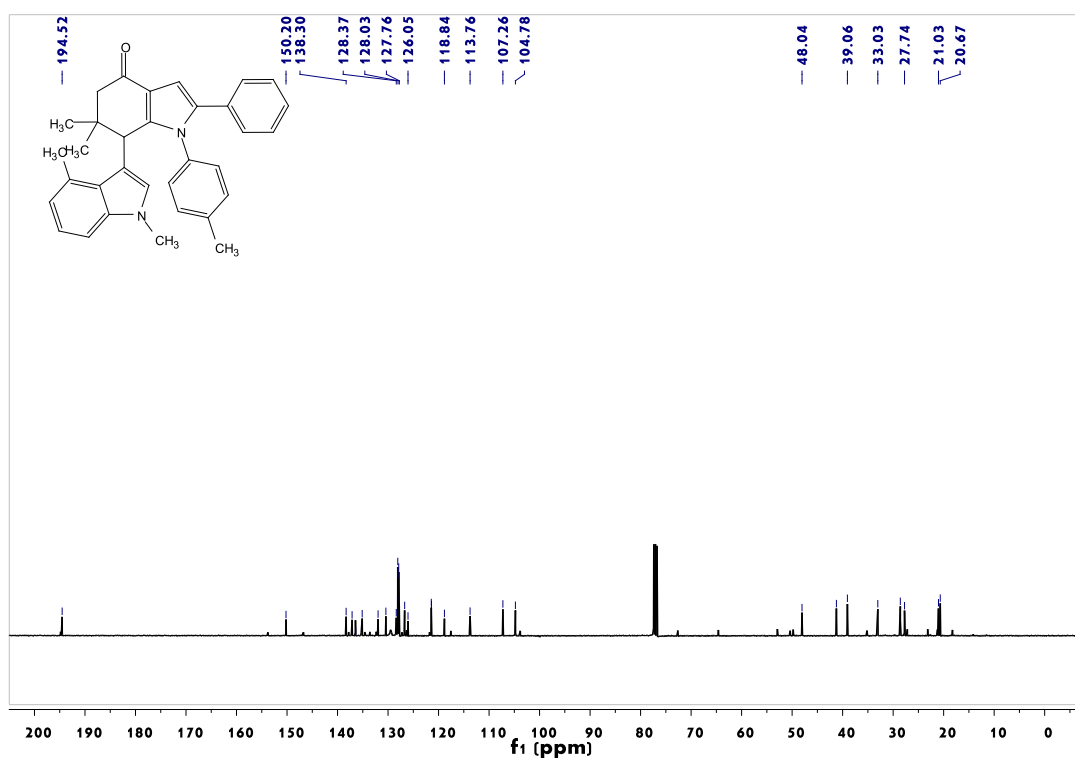

<sup>13</sup>C NMR (400 MHz, CDCl<sub>3</sub>) for **8d**

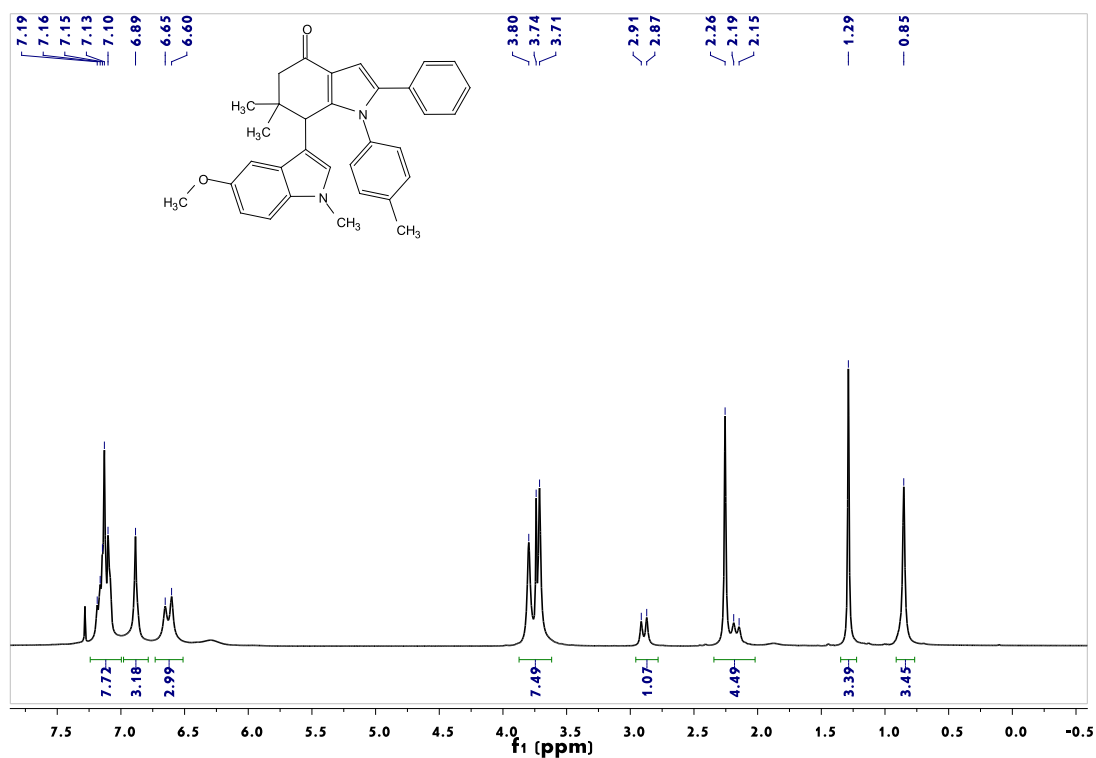

<sup>1</sup>H NMR (400 MHz, CDCl<sub>3</sub>) for **8e**

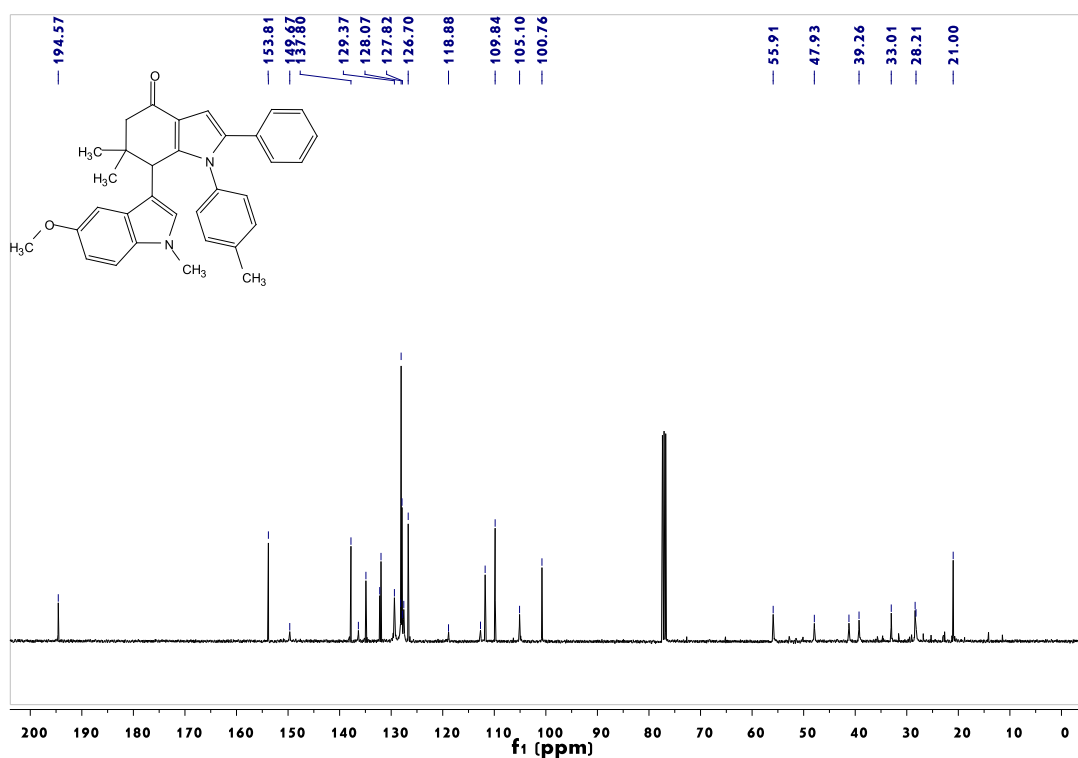

<sup>13</sup>C NMR (400 MHz, CDCl<sub>3</sub>) for **8e**

## X-ray structure of compound **3a**

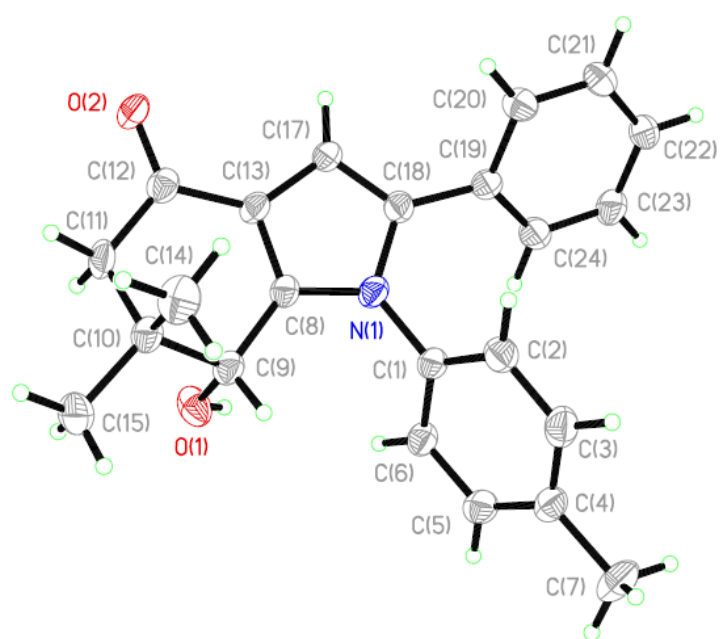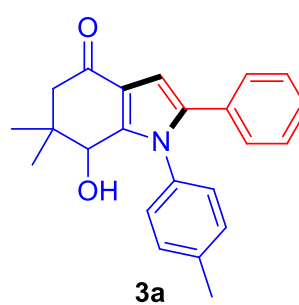

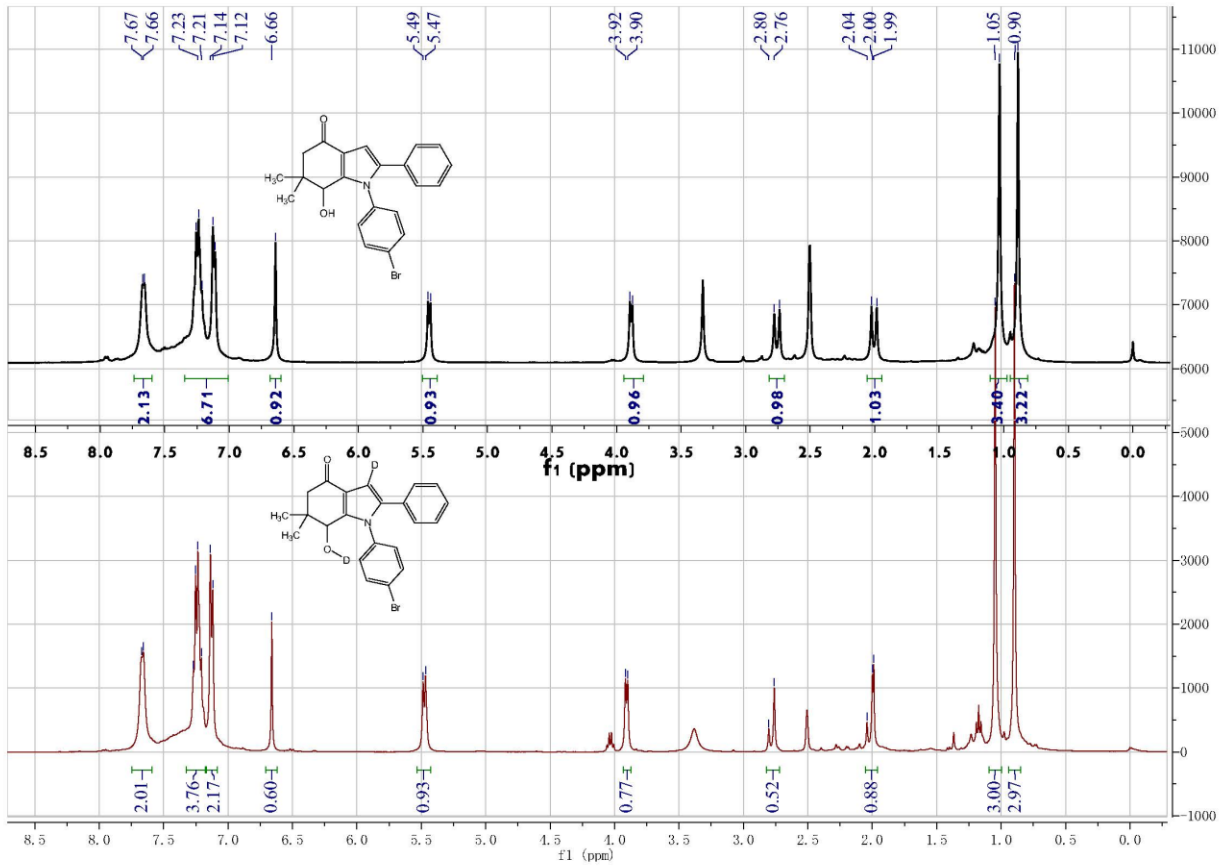

Supplement: c5ra09478j1.pdf [file c5ra09478j1.pdf]
